## 15 **Abstract**

16 Mangrove expansion monopolizes estuarine landscapes by diminishing habitat diversity and  
17 hence biodiversity. Physical landcover types, including mangrove vegetation, influence polychaete  
18 and avifauna habitat uses. The connections between the physical to biota-associated landscapes  
19 warrant investigation. We determine how to best describe the landscape in a mangrove-vegetated  
20 wetland according to the physical, polychaete and bird domains and identify what physical  
21 attributes would affect the biota-associated landscapes. Differences among the physical and biota-  
22 associated landscapes were evaluated using multivariate ordination analyses. Six physical  
23 landcover types were aligned along elevation, inundation and sedimentary gradients. The  
24 polychaete-associated landscape was structured by three landcover types, mainly mangroves and  
25 tidal flats with intermediate and high inundation. Deposit-feeding spionid and nereid, carnivorous  
26 goniadid and suspension-feeding sabellid polychaetes depended on the different landcover types.  
27 Shorebirds occurred distinctively in tidal flats with large, open surface areas. Egrets characterized  
28 tidal flats and mangroves, and foliage and ground gleaners characterized mangroves. Open tidal  
29 flats are crucial to polychaetes, which are the main prey of shorebirds and are also important to  
30 egret foraging. Our results suggest that effective management strategies for conserving these  
31 migratory birds require the maintenance of open tidal flats in the landscape.

32

33 **Keywords:** Landcover types; Physical setting; Biota-coupled landscape; Polychaete assemblage;  
34 Bird assemblage

## 35 **Introduction**

36       Essential components of a healthy mangrove ecosystem include mud and sand flats, tidal  
37 waterways, shallow water areas and circulating waters in addition to mangrove stands [1, 2]. These  
38 mosaic and interconnected landcover types make mangrove ecosystems varied in terms of  
39 landscape function and the production of both terrestrial and aquatic organisms [3-5]. Furthermore,  
40 mangrove ecosystems are also among the most threatened ecosystems on Earth due primarily to  
41 the devastating effects of anthropogenic activities [6, 7] and natural disturbance [8]. Assessments  
42 of the relationships between the supplies provided by mangroves and demand from human society  
43 have demonstrated intimate bottom-up and top-down connections between the functions of  
44 mangrove ecosystems and the services they offer to human wellbeing [9]. When considering  
45 mangrove trees alone, they compose a simple ecosystem with limited vegetation niches and low  
46 bird species richness [10, 11]. At the landscape level, however, landscape heterogeneity within  
47 both mangrove ecosystems and their surroundings is crucial in characterizing mangrove-dependent  
48 bird assemblages [11-13]. Mangroves have been found to have both positive and negative roles in  
49 ecosystems. For example, as they act as both foundation species and ecosystem engineering  
50 species, mangroves can substantially change landscape structure through their bihydrological  
51 attributes. These changes could promote habitat availability for some species but not for others  
52 [14]. To properly manage mangrove-dominated wetlands, the data necessary for understanding the  
53 interactions among the geomorphological, hydrological, biological and socioeconomic domains  
54 that underlie mosaic landscapes are still missing for many of these wetlands, and a lack of relevant  
55 knowledge has caused many mangrove rehabilitation efforts to fail [1].

56       Most suggestions regarding mangrove-associated landscape management have focused on

57 avifauna and the anthropogenic effects of different types of land use on bird communities [11-13].  
58 There are few studies reporting the landscape- and/or physical habitat-based connections between  
59 avifauna and their food sources [15]. Macrobenthos polychaetes and bivalves and fishes, for  
60 instance, are the main preys of shorebirds and egrets [15-17], while insects are a major food source  
61 of foliage gleaners [18]. Polychaete and bivalve distributions are largely controlled by local  
62 physical driving forces, including hydrology, geomorphology and sedimentology [19-23], while  
63 insect distributions are tightly associated with vegetation composition [24]. These findings suggest  
64 that bird distribution must closely follow the benthos and vegetation structure. Consequently, the  
65 context of a local landscape arises as a result of the physical setting and macroinvertebrate- and  
66 bird-specific landscapes. Information on these interconnected landscapes and human land uses  
67 would greatly improve conservation efforts focusing on mangrove-vegetated wetlands.

68 The Wazihwei Nature Reserve is located in the Danshuei River estuary, which hosts the  
69 northernmost population of the mangrove *Kandelia obovata* in Taiwan [25, 26]. This reserve was  
70 designated in 1994 to preserve the mangrove trees, which are strictly protected by Taiwan's  
71 Culture Heritage Reservation Act. This area is also an important wintering and stopover site for  
72 migratory shorebirds, egrets, and other waterbirds [27]. From 1984 to 2013 (30 years), some  
73 shorebird and egret populations remarkably declined by several tens to hundreds of times, while  
74 during approximately the same time period, the mangrove-vegetated area increased by  
75 approximately 30% [27]. These changes suggest that the decreasing waterbird abundance in this  
76 reserve might be attributed to the simplified landscape structure as a result of mangrove  
77 overexpansion [2].

78 To resolve the conflicts between mangrove protection and biodiversity enhancement, it is  
79 necessary to understand whether identifiable connections between the physical and biotic

80 landscapes exist and what physical attributes affect such connections. Using the Wazihwei wetland  
81 as a case study site, the purposes of the present study were to assess (1) how the best landcover  
82 types within the physical landscape and biotic landscape are characterized, in other words, how  
83 well the landscape is described by the physical and biotic domains, and (2) what physical attributes  
84 contribute to structuring the biota-coupled landscape. These assessments will promote our  
85 understanding and sound management of mangrove-vegetated wetlands from a landscape  
86 perspective.

87

## 88 **Materials and methods**

### 89 **Study area**

90 The study area is approximately 33.3 hectares in size and is located in the Wazihwei Nature  
91 Reserve adjacent to the mouth of the Danshuei River estuary in northern Taiwan (Fig 1, [27]). In  
92 the estuary, the M2 tide is the primary tidal constituent, with a mean tidal range of 2.3 m and up  
93 to 3.3 m during spring tides. From west to east, there were four main landcover types: mangrove  
94 vegetation, intertidal mud and sand flat, tidal creek and sand dune. The mangrove vegetation  
95 covered approximately 11.2 hectares and was composed of a single species, *Kandelia obovata*.  
96 The form of the tidal creek changed from its original meander into almost a straight line along with  
97 the expanding mangroves [28]. Anthropogenic activities included fishing boat anchoring,  
98 sightseeing on the walking trail and wastewater discharge from the upland residential communities  
99 and industries [27]. The construction of cement-paved roads and walking trails in the sand dune  
100 area had affected the local hydrodynamics and sediment transport, consequently shifting the outlet

101 of the tidal creek to the south and forming a curved sand spit to the southwest [28]. The plants  
102 found in the sand dune area consisted primarily of wormwood (*Artemisia capillaris*), beggar's tick  
103 (*Bidens pilosa* var. *radiata*), beach morning glory (*Ipomoea pescaprae* subsp. *brasiliensis*) and sea  
104 hibiscus (*Hibiscus tiliaceus*) [29].

105

106 **Fig 1 Sampling stations established in the studied Wazihwei Nature Reserve for the collection**  
107 **of physical attribute and polychaete and avian assemblage data.** Seven line transects were  
108 deployed under the mangrove canopy for water level measurement using a communication-vessel  
109 system. Dashed lines represent the 10 survey zones established for collecting bird variable data.

110

## 111 **Sampling schemes for physical attributes and biotic assemblages**

112 A grid composed of  $6 \times 8$  transects was deployed, and sampling stations were established  
113 where these transects intersected (Fig 1). The distance between stations was approximately 100 to  
114 165 m. Data on physical variables and the polychaete assemblage were collected simultaneously  
115 from all stations. Eight stations were established in the mangrove-vegetated zone. The inner  
116 intertidal flat was subdivided into areas that experience low (inLF), intermediate (inMF) and high  
117 (inHF) inundation according to the previously observed inundation frequency (Chen CP and Shih  
118 SS, personal observation), and 1 to 4 sampling stations were established within each of these areas.  
119 Five stations were established in the outer intertidal flat. Data on the physical variables at each of  
120 these 20 stations were collected every 3 months from October 2013 to July 2014. Thereafter, from  
121 January 2015 to October 2015, the number of sampling stations was reduced to 9: 2 in inHF, 1 in  
122 inMF, 3 in the outer intertidal flat, and 3 in the mangrove zone. As a result, a total of 116 samples  
123 ( $20 \text{ stations} \times 4 \text{ times} + 9 \text{ stations} \times 4 \text{ times}$ ) were collected. The same sampling scheme was  
124 used to sample the polychaetes, but the sampling period was only from October 2013 to July 2014,

125 resulting in a total of 80 samples.

126 The avifauna of the entire study area was surveyed along  $5 \times 4$  transect lines that were roughly  
127 perpendicular and parallel to the river channel (dashed lines in Fig 1). These lines delineated three  
128 landcover types (mangrove, intertidal flat and sand dune). The numbers of areas surveyed were 3  
129 in the mangrove vegetation (MA, MB, MC), 3 on the inner flat (inFA, inFB, inFC), and 1 in the  
130 outlet of the primary tidal creek on the flat (croF). Based on vegetation coverage (Huang SC,  
131 personal observation), the sand dune zone was subdivided into areas with high, intermediate and  
132 no vegetation (SdHV, SdMV, SdNV, respectively). The avifauna surveys were conducted monthly  
133 from October 2013 to November 2015 (except from October to December 2014) and included a  
134 total of 230 surveys (10 areas  $\times$  23 times).

### 135 **Measurements of physical attributes**

136 The geomorphological and hydrological variables measured included the exposed open  
137 surface area of the intertidal flat when the tides had completely retreated, elevation, slope,  
138 inundation frequency, flow resistance, and flow velocity. The topography of the nonmangrove area  
139 was investigated using a TOPCON Total Station (GTS226). The adjacent Tenth River  
140 Management Office, Water Resources Agency, Ministry of Economic Affairs, Taiwan, was used  
141 as the benchmark reference. The benchmark elevation and water stage records were obtained from  
142 the Taiwanese fundamental benchmark of Keelung. This fundamental benchmark was adopted as  
143 the zero orthometric height of Taiwan. Furthermore, a communicating-vessel system (CVS) was  
144 established under the mangrove canopy [27]. The water levels of the CVS were used to measure  
145 exact heights above the substratum surface across the mangrove stand area. The area where the  
146 topography significantly varied required more measurement points along an established transect.

147 Seven transects were established in the CVS survey (Fig 1). The elevation data from the mangrove  
148 and nonmangrove areas were then input into ArcGIS to produce topographic contour maps. Data  
149 indicating the slope and exposed open intertidal surface areas were obtained from this contour map  
150 and water stage records. A HOBO Water Level Logger (model U20-001-01) was installed in a  
151 nonmangrove location to monitor the water stage every 30 minutes. The Weibull method was  
152 employed to analyze the inundation frequency associated with the different water levels [30].

153 To acquire the flow characteristics, flow velocity and water depth of the reserve to evaluate  
154 different flow fields, a horizontal two-dimensional hydrodynamic model, RMA2, was used [31].  
155 Flow resistance, including friction drag and pressure drag, was calculated by multiplying the drag  
156 coefficient, object projected area (herein mangrove trees) and square of flow velocity [32]. The  
157 annual daily flow discharge of the Danshuei River was set as the upstream boundary of the model,  
158 while the hourly water level recorded at the river-mouth gauge station during ebbing (from high  
159 tide to low tide) was considered as the downstream boundary. The Manning's n values of the  
160 mangrove and nonmangrove areas were set as 0.08 and 0.03 [33, 34]. The eddy viscosity was set  
161 to  $20 \text{ m}^2 \text{ s}^{-1}$  considering the shallow and slow flow in wetlands [35].

162 The measured sediment variables included grain size, silt and clay content, sorting coefficient,  
163 moisture content and pH. Sediment cores were collected from each station using an acrylic tube  
164 with a diameter of 2.6 cm. During transport to the laboratory, all sediment samples were kept cool  
165 at approximately  $4^\circ\text{C}$ . Granulometry was determined following a protocol developed by Hsieh and  
166 Chang (1991) [36]. In the laboratory, interstitial water was obtained after the sediments were  
167 centrifuged, and its pH values were measured using a pH meter (Mettler Toledo InLab 437).  
168 Moisture content was calculated as the percent weight loss after the sediments were oven dried at  
169  $60^\circ\text{C}$  to a constant weight. Expressions of units for all physical attributes are given in S1 Table.



## 170 **Measurement of biotic assemblages**

171 Polychaete assemblages were sampled using a PVC corer with a diameter of 10 cm that was  
172 pushed approximately 10 cm deep into the sediment. Then, the contained sediment was sieved  
173 through a 0.5 mm screen. The specimens retained on the screen were relaxed in menthol and fixed  
174 in 90% ethanol. The polychaete specimens were identified to the lowest taxonomic level, and the  
175 numbers of individuals in each polychaete taxon were counted. Polychaete densities were  
176 expressed as the number of individuals  $m^{-2}$ .

177 The avifauna was surveyed using transect and total count methods. In the mangrove-vegetated  
178 zone, transect counts, which heavily depend on the detection of bird sounds, were performed along  
179 the transects at a walking speed of 1-1.5  $km\ hr^{-1}$ . Total counts were conducted in open areas where  
180 birds could be directly observed. Three total count locations, two at approximately the northern  
181 and southern tips of the inner tidal flat and one in the sand dune area, were established (Fig 1).  
182 Locations of bird individuals were recorded with the aid of 8 × 25 binoculars and a 20 × 60  
183 telescope. The bird surveys were conducted for approximately 1 to 1.5 hrs during ebb tides at  
184 daytime. The recorded bird species were divided into 6 guilds: shorebirds, egrets, waterfowl,  
185 ground gleaners, foliage gleaners and aerial predators (listed in S2 Table).

## 186 **Statistical analyses**

187 To improve normality for the multivariate analyses, we transformed the physical attribute and  
188 biotic variable data. The transformation formulae are listed in S1 Table. Only species in the  
189 polychaete assemblage constituting more than 2% of the total abundance or showing greater than  
190 2.5% occurrence in all samples were included in the multivariate analyses to reduce the influence  
191 of rare species on the ordination [37]. A total of 6 polychaete species (see S6 Table) and 6 avian

192 guilds were used in the analyses. The included polychaetes commonly occur in the Danshuei River  
193 estuary [37].

194 We used the multivariate ordination technique of canonical discriminant analysis (CDA, [38])  
195 to distinguish the best landcover types on the basis of the physical attribute and biotic assemblage  
196 variables. This analysis was also used to identify which variables constitute the principal  
197 components differentiating the landcover types. The abundances of polychaete species and the  
198 abundance and species richness of bird guilds with correlation coefficients with the Can1 and Can2  
199 variables greater than 0.40 were considered important components and included in subsequent  
200 analyses.

201 We also used other ordination methods, canonical correspondence analysis (CCA) and  
202 redundancy analysis (RDA, [38]), to examine the relationships among the biotic variables and  
203 physical attributes. In analyses of the relationships for the bird assemblages, only the datasets that  
204 simultaneously contained both bird variables and sedimentary attributes were used. In addition,  
205 because each bird survey zone (Fig 1) was large and included several stations used for collecting  
206 sedimentary attributes, the values of the sedimentary attributes for each bird survey zone were the  
207 means of those attributes collected from the given stations in that given zone. A prior principal  
208 component analysis (PCA) or detrended correspondence analysis (DCA) was separately conducted  
209 with the data for the polychaete or avian assemblages to assess the gradient lengths of the first  
210 PCA or DCA axis. The lengths of the gradients were 4.9 and 1.6 (in SD units) for the density of  
211 the polychaetes and the abundance plus species richness of the bird assemblages, respectively.  
212 Therefore, the unimodal model (CCA) was appropriate for the polychaete assemblages, while a  
213 linear model (RDA) was more appropriate for the bird assemblages [39]. We used the automatic  
214 forward-selection mode in our analyses and only included environmental or so-called explanatory

215 variables that explained a significant proportion of the remaining variation based on a Monte Carlo  
216 test with 999 permutations at  $p < 0.1$ . The CDA was performed using SAS software 9.4 [40], while  
217 the ordination analyses (CCA and RDA) were conducted using CANOCO for Windows v.5.0 [41].

218

## 219 **Results**

### 220 **Physical attributes**

221 On average, the exposed open intertidal surface area was 18,517 m<sup>2</sup>; the elevation was 0.74  
222 m above the mean sea water level; the slope was mild and with 0.06 inclination; the inundation  
223 frequency was 24%; and the flow velocity was slow, at 0.06 m sec<sup>-1</sup>, while the flow resistance was  
224 0.12 N m<sup>-2</sup> (S3 Table).

225 The sediments consisted of poorly sorted fine sand with moderate amounts of silt-clay and  
226 moisture while the interstitial water was approximately neutral. The grain size averaged 130 µm,  
227 the silt-clay content was 38.7%, the sorting coefficient was 1.63, the moisture content was 30.6%,  
228 and the pH was 7.06 (S3 Table).

### 229 **Abundance and species richness of the biotic assemblages**

230 Thirteen polychaete species, including one unknown species among the juvenile nereids, were  
231 recorded, with a mean density of 440.7 individuals m<sup>-2</sup> (Table 1). The capitellid *Capitella* sp., the  
232 spionid *Malacoceros indicus* and the nereid *Neanthes glandicineta* were among the most abundant  
233 species, with densities of 147.4, 96.2, and 80.1 individuals m<sup>-2</sup>, respectively. These three species  
234 represented 73.5% of the whole polychaete assemblage. The remaining polychaete species  
235 exhibited lower densities, ranging from 1.6 to 36.8 individuals m<sup>-2</sup>.

236 A total of 4715 bird individuals and 58 bird species were recorded (S2 Table). Egrets and  
 237 shorebirds were the two most abundant guilds, with an average of 9.9 and 7.4 counts per survey,  
 238 respectively. These two guilds combined accounted for 84.3% of the total bird counts (overall  
 239 average: 20.5 counts, Table 1). The ground and foliage gleaners presented fewer counts, and the  
 240 aerial predators and waterfowl were even rarer. Twenty-four species of shorebirds were recorded  
 241 and constituted 41.4% of the total bird species (Table 1).

242 **Table 1 Mean and relative abundance of polychaete and avian assemblages and avian**  
 243 **species richness in the Wazihwei Nature Reserve wetland in the Danshuei estuary,**  
 244 **northern Taiwan during 2013-2015**

| Biotic assemblages                                 | Mean $\pm$ SE<br>or Total | Relative<br>abundance<br>(%) |
|----------------------------------------------------|---------------------------|------------------------------|
| Polychaete (N=80, individuals m <sup>-2</sup> )    |                           |                              |
| <i>Capitella</i> sp.                               | 147.4 $\pm$ 57.75         | 33.5                         |
| <i>Malacoceros indicus</i>                         | 96.2 $\pm$ 26.26          | 21.8                         |
| <i>Neanthes glandicineta</i>                       | 80.1 $\pm$ 37.57          | 18.2                         |
| <i>Goniada japonica</i>                            | 36.8 $\pm$ 10.98          | 8.4                          |
| <i>Prionospio japonica</i>                         | 25.7 $\pm$ 18.02          | 5.8                          |
| <i>Laonome albicingillum</i>                       | 14.4 $\pm$ 6.45           | 3.3                          |
| <i>Perinereis aibuhitensis</i>                     | 9.6 $\pm$ 3.79            | 2.2                          |
| <i>Lumbrineris</i> sp.                             | 9.6 $\pm$ 9.61            | 2.2                          |
| <i>Scolecopsis kudenovi</i>                        | 6.4 $\pm$ 5.05            | 1.5                          |
| <i>Polydora cornuta</i>                            | 4.8 $\pm$ 2.74            | 1.1                          |
| Nereid juvenile                                    | 4.8 $\pm$ 4.81            | 1.0                          |
| <i>Namalycastis abiuma</i>                         | 3.2 $\pm$ 2.25            | 1.0                          |
| <i>Rhynchospio glutea</i>                          | 1.6 $\pm$ 1.60            | < 1                          |
| Sum                                                | 440.7 $\pm$ 93.28         | 100                          |
| Avian guilds (N=230, counts survey <sup>-1</sup> ) |                           |                              |

|                                                           |             |      |
|-----------------------------------------------------------|-------------|------|
| Egret                                                     | 9.9 ± 1.65  | 48.4 |
| Shorebird                                                 | 7.4 ± 0.84  | 35.9 |
| Ground gleaner                                            | 1.6 ± 0.51  | 8.0  |
| Foliage gleaner                                           | 1.4 ± 0.29  | 6.6  |
| Aerial predator                                           | 0.1 ± 0.04  | 0.6  |
| Waterfowl                                                 | 0.1 ± 0.10  | 0.6  |
| Sum                                                       | 20.5 ± 2.02 | 100  |
| Avian guilds (N=230, numbers of species from all surveys) |             |      |
| Shorebird                                                 | 24          | 41.4 |
| Foliage gleaner                                           | 10          | 17.2 |
| Egret                                                     | 9           | 15.5 |
| Ground gleaner                                            | 9           | 15.5 |
| Aerial predator                                           | 3           | 5.2  |
| Waterfowl                                                 | 3           | 5.2  |
| Sum                                                       | 58          | 100  |

---

245

## 246 **Landcover types distinguished according to physical attributes**

247 According to the CDA based on the physical attributes, six landcover types were well  
248 distinguished (Table 2). These landcover types were the outer flat (outer), mangroves, inner low  
249 inundation flat (inLF), inner intermediate inundation flat (inMF), and inner high inundation flat  
250 (inHF) (Fig 2A, S4 Table). The latter was further separated into two subtypes: one included  
251 Stations 1, 2, and 3, and the other included Station 4. Station 4 was located at a much higher  
252 elevation and had greater flow velocity and resistance than Stations 1, 2, and 3 (S5 Table).

253 In terms of the differentiation of landcover types, on Can1, elevation and inundation  
254 frequency were the most important variables, and these two factors were inversely correlated. On  
255 Can2, the sorting coefficient, moisture content and grain size were the most important attributes,  
256 and the latter variable was inversely correlated with the former two attributes (Fig 2B). These

257 ordinations showed the existence of two intercorrelated zonal gradients across the landscape.  
258 One was decreasing elevation with increasing inundation, and the other was decreasing grain size  
259 with decreasing sorting degree but increasing moisture content (Fig 2). The outer flat, inner low  
260 inundation flat and mangroves were located at higher elevations in the northern, northeastern and  
261 southwestern regions relative to the lower-elevation inner intermediate and high inundation flats  
262 in the central southern regions (0.95 to 1.97 m above vs. 0.04 m below mean sea level). The  
263 inundation became prolonged across these regions in a trend parallel to the inclination in which  
264 the inner high inundation flat was covered with water more than 5-fold longer than the inner low  
265 inundation flat and mangrove vegetation (54% vs. none and 10% of the time, respectively).

266 In terms of the sedimentary gradient, the sediment in the outer flat and inner low  
267 inundation flat consisted of sand and was moderately to poorly sorted (0.84 to 1.56), with larger  
268 grain particles (191 to 272  $\mu\text{m}$ ) and less moisture (approximately 19%) in the northern and  
269 northeastern regions than in the southwestern and southern regions (Fig 2B, S4 Table). In  
270 addition, the sediment in the mangrove and inner intermediate and high inundation flat areas was  
271 composed of mud (44 to 67  $\mu\text{m}$ ) with high moisture (approximately 40%) and was poorly sorted  
272 (1.75 to 2.08).

273

274 **Fig 2. The results of canonical discriminant analysis for physical landcover types. (A)**

275 Differentiation of six physical landcover types. (B) Ordination of physical attributes. Landcover  
276 type abbreviations as in Fig 1. Note that for the inner high inundation flat (inHF), the small  
277 cluster at the right of the larger cluster consists of samples from Station 4.

278 **Table 2. Summary of the results of the canonical discriminant analysis (CDA) performed on physical attributes and polychaete**  
 279 **and avian assemblages**

| Variables           | Wilks' lambda p | Cumulative % variance explained <sup>a</sup> | Canonical correlations |               |         |          |                |               |         |          |
|---------------------|-----------------|----------------------------------------------|------------------------|---------------|---------|----------|----------------|---------------|---------|----------|
|                     |                 |                                              | r <sub>1</sub>         | Test          |         |          | r <sub>2</sub> | Test          |         |          |
|                     |                 |                                              |                        | Approximate F | df      | p        |                | Approximate F | df      | p        |
| Physical attributes | < 0.0001        | 96                                           | 0.95                   | 32.66         | 32, 385 | < 0.0001 | 0.92           | 19.22         | 21, 302 | < 0.0001 |
| Polychaete          | < 0.0001        | 84                                           | 0.80                   | 8.06          | 24, 245 | < 0.0001 | 0.68           | 5.85          | 15, 196 | < 0.0001 |
| Avifauna Abundance  | < 0.0001        | 97                                           | 0.72                   | 8.60          | 30, 878 | < 0.0001 | 0.48           | 3.54          | 20, 730 | < 0.0001 |
| Species richness    | < 0.0001        | 95                                           | 0.78                   | 12.53         | 30, 878 | < 0.0001 | 0.56           | 5.55          | 20, 730 | < 0.0001 |

280 <sup>a</sup>: from combination of Can1 and Can2

## 281 **Association between landcover type and polychaetes**

282 According to the CDA, the density distributions of polychaete species were associated with  
283 three distinguishable landcover types (Table 2). These landcover types were primarily the inner  
284 high and intermediate inundation flats as well as the mangrove vegetation (Fig 3A). In addition to  
285 these three separable landcover types, the inner intermediate inundation flat also occurred in  
286 combination with mangrove vegetation in several locations, while mangrove vegetation was also  
287 associated with all of the outer and inner low inundation flats and some locations of the inner  
288 intermediate inundation flat.

289 In regard to the differentiation of landcover types on Can1, the densities of the goniadid  
290 *Goniada japonica* and the spionid *Malacoceros indicus* were the most important variables and yet  
291 exhibited opposite effects. The density of the sabellid *Laonome albicingillum* was the third most  
292 important factor. On Can2, the densities of the nereid *Neanthes glandicineta* and the capitellid  
293 *Capitella* sp.1 played the most important roles (Fig 3A). These data reveal that each of the three  
294 landcover types was associated with a distinct polychaete species: *G. japonica* mostly occurred in  
295 the inner flat with high inundation, while *M. indicus* was primarily distributed in the mangrove  
296 area, and *N. glandicineta* was most abundant in the inner flat with intermediate inundation (Fig 3).  
297 The densities of *G. japonica* in inHF, *M. indicus* in the mangroves and *N. glandicineta* in inMF  
298 averaged 165.8, 252.1 and 712.2 individuals m<sup>-2</sup>, respectively (S6 Table).

299

300 **Fig 3. The results of canonical discriminant analysis for polychaete assemblage. (A)**

301 Differentiation of three polychaete-associated landcover types. (B) Ordination of polychaete

302 densities. Landcover type abbreviations as in Fig 1.



## 303 **Association between landcover type and birds**

304 The distribution of avian guilds was associated with two landcover types (Table 2). One  
305 landcover type consisted primarily of the flats, including the inner flat (inF) and the creek opening  
306 flat (croF), while the other type consisted of the mangroves (Fig 4A). In addition to this separation,  
307 further grouping indicated that the flat zone as a whole also occurred in combination with another  
308 three zones, including the intermediately vegetated sand dune (SdMV), the unvegetated sand dune  
309 (SdNV) and some locations with mangroves. Similarly, the mangrove area as a whole also  
310 included the highly vegetated sand dune (SdHV).

311 When the landcover types were separated, shorebirds had the most significant effect on Can1,  
312 while the effects of foliage gleaners were also important but had opposite effects as shorebirds. On  
313 Can2, the count of egrets had the greatest effect (Fig 4B). As a result, the two landcover types were  
314 characterized by distinguishable avian guilds, where shorebirds were dominant in the inner flat  
315 and creek opening flat while foliage and ground gleaners occurred primarily in the mangroves.  
316 Noticeably, the egrets were associated with both the tidal flat and mangroves, while the shorebirds,  
317 in one case, were exceptionally abundant in the intermediately vegetated sand dune area (Fig 4).

318

319 **Fig 4. The results of canonical discriminant analysis for individuals of avian assemblage.**

320 (A) Differentiation of three bird-associated landcover types. (B) Ordination of bird counts.

321 Landcover type abbreviations as in Fig 1. Note that some samples in mangroves overlapping  
322 with those in inner flat (inF) and creek opening flat (croF) areas correspond to egrets.

323

324 When the same analyses used for avian guilds were used, two landcover types were also  
325 distinguishable for avian species composition (Table 2). One landcover type consisted primarily of

326 the flat zones, including the inner flat and the creek opening flat, while the other landcover type  
327 comprised the mangrove area. Further evaluation showed that each of these two identified landcover  
328 types occurred in combination with additional landcover types and that the types grouped into each  
329 of these two types were similar to those observed for the count attributes (Fig 5A). On Can1, the  
330 shorebirds and egrets had the most significant effect for avian species composition, while the foliage  
331 and ground gleaners were also important but had opposite effects. On Can2, the egrets, foliage  
332 gleaners and ground gleaners were the most important factors (Fig 5B).

333

334 **Fig 5. The results of canonical discriminant analysis for species richness of avian**  
335 **assemblage.** (A) Differentiation of two bird-associated landcover types. (B) Ordination of bird  
336 species richness. Landcover type abbreviations as in Fig 1.

337

338

## 339 **Relationships among the polychaete assemblage and physical**

### 340 **attributes**

341 According to the CCA, six physical attributes (elevation, inundation frequency, pH, slope, flow  
342 velocity and moisture) affected the 6 polychaete species distributions (pseudo  $F = 4.1$ ,  $p = 0.001$ ,  
343 Table 3). The CCA ordinations revealed that *G. japonica* and *L. albicigillum* were most abundant in  
344 frequently inundated areas, while *N. glandicineta* was primarily associated with high flow velocity  
345 (Fig 6). In contrast, *P. aibuhitensis* and *M. indicus* tended to aggregate at locations with relatively  
346 high elevation and inclination. *Capitella* sp. showed a similar trend, but to a lesser extent.

347

348 **Fig 6. Ordination of the polychaete assemblage with physical attributes using canonical**  
349 **correspondence analysis.** Solid triangles represent polychaete assemblage, while arrows  
350 represent physical attributes.

351 **Table 3. Summary of the results of the canonical correspondence analysis (CCA) performed on the polychaete assemblage and**  
 352 **the redundancy analysis (RDA) performed on the bird assemblage**

|                                  | Ordination axis |       |       |       | Total<br>variance | Full model |       |       |
|----------------------------------|-----------------|-------|-------|-------|-------------------|------------|-------|-------|
|                                  | 1               | 2     | 3     | 4     |                   | Pseudo-F   | df    | p     |
| <i>Polychaetes</i>               |                 |       |       |       |                   |            |       |       |
| Eigenvalue                       | 0.735           | 0.212 | 0.143 | 0.047 | 3.051             | 4.1        | 5, 74 | 0.001 |
| Pseudo-canonical correlation     | 0.924           | 0.572 | 0.496 | 0.314 |                   |            |       |       |
| Cumulative % variance explained  |                 |       |       |       |                   |            |       |       |
| Explained variation              | 24.19           | 31.0  | 35.7  | 37.3  |                   |            |       |       |
| Explained fitted variation       | 63.3            | 81.5  | 93.8  | 97.8  |                   |            |       |       |
| Sum of all canonical eigenvalues |                 |       |       |       | 1.162             |            |       |       |
| <i>Birds</i>                     |                 |       |       |       |                   |            |       |       |
| Eigenvalue                       | 0.180           | 0.113 | 0.027 | 0.004 | 1.000             | 3.3        | 7, 56 | 0.001 |
| Pseudo-canonical correlation     | 0.613           | 0.631 | 0.417 | 0.349 |                   |            |       |       |
| Cumulative % variance explained  |                 |       |       |       |                   |            |       |       |
| Explained variation              | 18.0            | 29.3  | 32.0  | 32.3  |                   |            |       |       |
| Explained fitted variation       | 55.3            | 89.9  | 98.3  | 99.4  |                   |            |       |       |
| Sum of all canonical eigenvalues |                 |       |       |       | 0.325             |            |       |       |

353

## 354 **Relationships among the avian assemblage and physical attributes**

355 According to the RDA, eight physical attributes, including the surface area of the exposed  
356 open tidal flat, grain size, elevation, sorting degree, silt and clay content, inundation frequency,  
357 moisture and pH, significantly affected avian counts and species richness (pseudo  $F = 3.3$ ,  $p =$   
358  $0.001$ , Table 3). The RDA ordinations revealed that the shorebird counts and species richness were  
359 highest in locations with large open tidal surface areas and prolonged inundation, while the egret  
360 counts and species richness were greatest in locations with fine-grained sediment with relatively  
361 high silt and clay contents (Fig 7). In contrast, the foliage and ground gleaner counts and species  
362 richness were greatest at locations at relatively high elevation.

363

364 **Fig 7. Ordination of individuals and species richness of the avian assemblage with physical**  
365 **attributes using redundancy analysis.** Solid arrows represent avian individual while dashed  
366 arrows represent avian species richness and solid arrows with transparent heads represent physical  
367 attributes. Abbreviations are ind: individual, sp: species richness, sb: shorebird, eg; egret, wf:  
368 waterfowl, gg: ground gleaner, fg: foliage gleaner, ap: aerial predator.

369

## 370 **Discussion**

### 371 **Variation in the composition of landcover types across the physical** 372 **and biotic landscapes**

373 Landscape structure and biotic interactions are inherently connected [14,15]. The landscape  
374 of the Wazihwei Nature Reserve, as illustrated in the present study, is similar to brocade in relation  
375 to the interplay of layers represented by the physical to polychaete and avian landscapes. The  
376 reserve encompasses six distinguishable physical landcover types, which create

377 geomorphological, hydrological and sedimentary zonation. These physical settings serve as  
378 functional habitats for biotic assemblages, including mangroves, polychaetes and avifauna.  
379 Noticeably, the polychaetes aggregated in three fewer, but also distinguishable, landcover types,  
380 primarily the inner flat with intermediate and high inundation as well as the mangroves. This  
381 finding suggests that the polychaetes perceive the outer flat and inner low inundated flat as habitats  
382 of similar type to the mangroves. The birds explored even fewer landcover types (two), mainly the  
383 exposed open tidal flat and the mangroves. The birds appear to treat nonvegetated or intermediately  
384 vegetated sand dunes as open tidal flat, while they may perceive highly vegetated sand dunes as a  
385 habitat type similar to mangroves because both contain vegetation. The abilities of these animals  
386 to cope with the circumstances of their physical settings for their survival and foraging may  
387 highlight the differences in the physically and biologically coupled landscapes seen in the present  
388 study.

389

## 390 **Functions of the physical setting-polychaete assemblage-coupled** 391 **landscape**

392 Infaunal polychaetes are particle feeders and burrowers. Their feeding and burrowing  
393 activities are profoundly constrained by local flow regimes and sedimentary properties [21-23].  
394 High silt and clay contents in sediments are associated with high organic matter (proxy of food  
395 particles) and retained water content [21, 22, 42]. Such characteristics are indicative of muddy  
396 habitats and feeble currents, which allow organic matter-laden food particles to rain down from  
397 the water column, consequently favouring deposit feeding [21, 22]. At the studied reserve, the  
398 mangrove habitat is located at relatively high elevations and has mud substrate and slow water  
399 flow, suggesting that this is a habitat favorable to deposit feeders. The spionid *M. indicus* and the

400 capitellid *Capitella* sp. are deposit feeders [43, 44]. Their presence at high abundance in the  
401 mangrove areas of the reserve is consistent with the aforementioned expectations. The highly  
402 inundated inner flat area is also muddy, but, in comparison to the mangrove habitat, experiences  
403 prolonged submergence and faster flows. Fast flow enhances particle fluxes in the water column,  
404 which is crucial for suspension feeding [20-22]. In muddy habitats, suspension conditions can also  
405 occur when tides move over the substratum surface to resuspend food particles that were once  
406 deposited on the bottom, making food particles available to suspension feeders. The sabellid *L.*  
407 *albicingillum* is a suspension feeder [44, 45]. Its distribution in the highly inundated inner flat  
408 patch agrees with the expectations of feeding associated with hydrology described above.

409       The distribution of *G. japonica* in the inner high inundation flat of the reserve agrees with  
410 those reported in other regions where *G. japonica* is abundant at low tidal levels (northern New  
411 Zealand, [46]; western Mexico and the United States of America, Warnock N and others.  
412 unpublished data). This polychaete occurrence in a habitat with prolonged immersion perhaps  
413 correlates to its motility and carnivory. It feeds on tube-dwelling polychaetes and pericarids in the  
414 sediment [44, 47]. As lower tidal areas are subject to immersion for a relatively long duration, the  
415 sediments here become less compacted and experience unconsolidation for longer periods of time  
416 [48]. This type of habitat can benefit the foraging of *G. japonica* because the animal can move  
417 more easily and has more time to search for its prey in the sediment. We suspect that the  
418 cooccurring tube-dwelling *L. albicingillum* is its prey.

419       *Neanthes glandicineta* is distributed in the inner intermediate inundation flat, where the flow  
420 velocity is greatest in the reserve. This nereid is a deposit feeder and burrower [45, 49]. Fast flow  
421 together with a certain grain size (approximately 0.1 - 0.4 mm in size) can result in the transport  
422 of food particles as bedload [22, 50], thus making benthic microalgae-associated particles

423 accessible to this deposit feeding nereid [45, 51]. In this type of flat habitat, another coinhabiting  
424 species is *Capitella* sp., which is a subsurface deposit feeder and burrower. The correlation of its  
425 distribution with fast flow might be explained in part by its specific colonization pattern at both  
426 the adult and larval stages. These worms actively recruit in the high tidal zone and soon burrow  
427 into the sediment, where the flow is faster than that in the low tidal zone [52].

## 428 **Functions of the physical setting-avifauna coupled landscape**

429 Most shorebirds prefer foraging in unvegetated areas or those that are sparsely covered by  
430 short plants [53, 54]. The shorebirds at Wazihwei Nature Reserve were predominantly distributed  
431 in the open tidal flats. This trend reflects that shorebirds must rely on open tidal areas for foraging,  
432 a phenomenon that has been recorded extensively among most migratory shorebirds [16, 55-57].  
433 In contrast to the large flocks of Kentish plovers (*Charadrius alexandrinus*) and dunlins (*Calidris*  
434 *alpina*) feeding at the upper site of the inner flat with high inundation and in the creek opening flat  
435 (inFB is approximately near Station 4 in inHF and croF, see Fig 1), a very large flock of wintering  
436 Pacific golden plovers (*Pluvialis fulva*) was found in the sand dunes with intermediate vegetation  
437 (SdMV). This sand dune patch is sparsely covered by a creeping vine, the beach morning glory  
438 (*Ipomoea pes-caprae*), and a short weed plant, the black jack (*Bidens chilensis*). The small amount  
439 of vegetation in this patch results in a large beach area resembling an open sandy tidal flat, thus  
440 becoming suitable for shorebird foraging.

441 Egrets compose another exceptionally abundant guild in the intertidal flats. Large flocks of  
442 the little egret (*Egretta garzetta*) and the summer migrant the cattle egret (*Bubulcus ibis*) also feed  
443 in the inner flat and the creek opening flat together with the shorebirds. In addition to feeding in  
444 the open tidal flat patches, the egrets use mangrove patches as well. Little egrets, cattle egrets,  
445 black-crowned night-herons (*Nycticorax nycticorax*) and sacred ibises (*Threskiornis aethiopicus*)

446 make nests within the mangroves (MB area, see Fig 1) during the summer from March to August.  
447 Their distributions in the reserve reveal that these four egret species share common nesting and  
448 feeding sites [27]. Furthermore, observations within a nearby mangrove reserve also within the  
449 Danshuei estuary have attributed damage to mangrove trees to droppings from and twigs trampled  
450 by nesting egrets and sacred ibises (personal communication with Pei-Fen Lee at the Institute of  
451 Ecology and Evolutionary Biology, National Taiwan University). We speculate that if nesting and  
452 roosting by these birds are intensified, the deterioration effects on the mangroves may change the  
453 landscape of this reserve.

454 The foliage gleaners, the light-vented bulbul (*Pycnonotus sinensis*) and the Japanese white-  
455 eye (*Zosterops japonicus*), are frugivores, nectarivores and insectivores [58-61]. Their diets consist  
456 of a variety of plants and small animals, such as fleshy fruits, flowers, dipteran insects, spiders,  
457 snails and slugs. Among the ground gleaners, the Eurasian tree sparrow (*Passer montanus*) alone  
458 accounts for 58.2% of the total ground gleaner count and is the dominant species. This species  
459 feeds mainly on wild plant seeds but shifts to insects when raising its nestlings. Dietary insects  
460 include dipterans, coleopteran adults and larvae and larval lepidopterans [62, 63]. Mangroves not  
461 only produce pollen and nectar [64] but also harbor various invertebrates, including insects. Such  
462 insects include nonbiting midges (Chironomidae), biting midges (Ceratopogonidae), flies,  
463 coleopterans and lepidopterans [65]. In addition, flowering trees, such as the native coast hibiscus  
464 (*Hibiscus tiliaceus*), are distributed on sand dunes with vegetation patches. Furthermore, seed-  
465 producing weeds, such as the common reed (*Phragmites australis*) and wedelia (*Wedelia*  
466 *trilobata*), cover a narrow sandy zone adjacent to the southeastern edge of the mangrove patch  
467 (zone MC, personal communication with Gwo-Wen Hwang at Hydrotech Research Institute,  
468 National Taiwan University). These vegetated patches make flowers, nectar, seeds and insects



469 available to the foliage and ground gleaners.

## 470 **Contributions of the tidal flat and vegetation patches to the avian** 471 **landscape**

472 Most shorebirds engage in foraging at falling, low and rising tides on open mudflats [55, 66];  
473 therefore, increases in open tidal surface area and a lengthening of time after exposure can enhance  
474 shorebird feeding success [66]. Given that the tidal flat area in the reserve (including the inner  
475 mudflat and the creek opening flat) has a large open tidal surface area and experiences the  
476 lengthening of tidal phases, the shorebirds had relatively long times and large areas over which  
477 they searched for food. As a result, the tidal flat, covering approximately 43% of the study area,  
478 represents the most vital “shorebird landscape”.

479 A short distance flown between a feeding and breeding site has been found in some egret  
480 species. This close spatial connection has been attributed to bird nesting success or low foraging  
481 cost [67-70]. At the present study site, egrets exhibit a spatial proximity of approximately 300 m  
482 between their feeding mudflat and nesting mangrove habitats. We suspect that this close spatial  
483 connection might attract egrets to use this reserve, particularly Little Egrets and Cattle Egrets. The  
484 combination of the tidal flat and mangrove habitats represents a unique “egret landscape”.

485 The mangroves in our study site consist of a single species, *Kandelia obovata*, and compose  
486 a simple vegetation structure. Joining the mangrove patch to the patches of the highly vegetated  
487 sand dune and the narrower strip adjacent to the mangrove area appears to enhance the vegetation  
488 complexity. Such a vegetation setting represents a “foliage and ground gleaner landscape”.

## 489 **Effects of mangroves on the functional landscape**

490 In the reserve, the mangrove vegetation patch, covering approximately 34% of the whole

491 area, is the most conspicuous landscape other than the intertidal flat. As an ecosystem foundation  
492 and engineering species, the mangroves interact with driving forces, hydrodynamics,  
493 sedimentation and topography, thus changing the landscape of the mangrove-dominated  
494 ecosystem [2, 14, 71]. Mangrove overgrowth facilitates the homogenization of landscape structure  
495 and results in lowered macrofaunal species richness in wetland ecosystems from the bottom  
496 sediment to understory and canopy layers [2, 10, 13]. Consequently, the services provided by  
497 mangrove ecosystems, particularly those that contribute to human wellbeing, are limited [9]. The  
498 question of how to enhance species richness through the diversification of habitat patches and the  
499 restriction of mangrove expansion was previously addressed in a partial mangrove removal  
500 experiment conducted in the same estuary. This field experiment demonstrated that the creation of  
501 a small patchwork of mudflats through the partial removal of mangroves dramatically increased  
502 the species richness of wintering shorebirds [2]. In cost-effective practice in Mai Po Ramsar site,  
503 WWF Hong Kong carry out mangrove management works to remove mangrove seedlings that are  
504 growing on tidal mudflat for sustaining mudflat area where benthic fauna is abundant [72].

## 505 **Recommendations for the landscape-based management**

506 Colonization by mangroves depends on the presence of a previously existing land formation  
507 [73] while increasing siltation facilitates mangrove establishment [71, 74]. Therefore, ecological  
508 engineering approaches such as prevention of fine sediment deposition to sustain mud flats can be  
509 applied in the reserve. In addition, the understanding of why tidal flats are important needs to be  
510 delivered in public education programs. We recommend the following managerial strategies:

- 511 1. To retain unvegetated tidal muddy and sandy flats by controlling mangrove expansion can  
512 benefit the shorebird, egret and polychaete's habitation. Mangrove trees and seedlings  
513 growing along the areas between the mangrove edge adjacent to the tidal creek should be

- 514 periodically removed to create open tidal areas.
- 515 2. To enhance tidal flushing and circulation within the reserve by widening and deepening the  
516 tidal creek opening. This action prevents siltation, thus, slows down mangrove colonization.
- 517 3. To restore naturally and hydrologically driven tidal creek by meandering instead of  
518 straightening the creek. This ecological engineering approach combining with mangrove  
519 removal along the tidal creek further create more tidal flats.
- 520 4. To remove the invasive Sacred Ibis *Threskiornis aethiopicus* by attempting the methods  
521 recently delivered by the Taiwan government (<https://e-info.org.tw/node/216895>). The  
522 methods are such as catching eggs and chicks while adults may be removed using net traps  
523 and air gun shooting. This action helps to protect Taiwan native birds.
- 524 5. To promote environmental education and ecotour programs on the trail in the sand dune  
525 patches. Program activities include such as aesthetic experiences in the reserve landscape and  
526 the living creatures that this landscape supports.

527

## 528 **Conclusions**

529 Our study in a mangrove vegetation-dominated estuarine wetland highlights the existence of  
530 a vital landscape through linkages from the physical landscape, as the foundation, to the  
531 polychaete- and bird-dependent landscapes. Among the physical landcover types, open tidal mud-  
532 sand flat is important because it supports the polychaetes and foraging shorebirds and egrets. This  
533 result reflects the effects of the physical landscape on the mediation of the polychaete and bird  
534 landscapes. Mangrove vegetation also serves as a significant habitat type but can compete with the  
535 tidal flat habitat. Therefore, effective management of the bird landscape, particularly to conserve  
536 migratory shorebirds and egrets, requires an integrated strategy that involves maintaining open

537 tidal flats in the landscape.

538

## 539 **Acknowledgements**

540 The authors are grateful to the New Taipei City Government and the Ministry of Science and  
541 Technology (MOST 103-2621-M-002 -020, MOST 106-2621-M-002 -004 -MY3), Taiwan, for  
542 funding support. The Tenth River Management Office, Water Resources Agency, Taiwan,  
543 provided the river cross-sectional bathymetry data and water level data. We also want to thank  
544 GW Hwang, CW Chang, and CY Chen, who assisted in the field.

## 545 **References**

- 546 1. Bosire JO, Dahdouh-Guebas F, Walton M, Crona BI, Lewis R., Field C, et al. Functionality  
547 of restored mangroves: a review. *Aquat. Bot.* 2008;89:251-259.
- 548 2. Huang SC, Shih SS, Ho YS, Chen CP, Hsieh HL. Restoration of shorebird-roosting  
549 mudflats by partial removal of Estuarine Mangroves in northern Taiwan. *Restor. Ecol.*  
550 2012;20:76-84.
- 551 3. Nagelkerken I, Blaber SJM, Bouillon S, Green P, Haywood M, Kirton LG, et al. The habitat  
552 function of mangroves for terrestrial and marine fauna: a review. *Aquat. Bot.* 2008;89:155-  
553 185.
- 554 4. Robertson AI, Alongi DM. Tropical Mangrove ecosystems. Coastal and estuarine series, 41.  
555 The American Geophysical Union: Washington, DC; 1992.
- 556 5. Zapata C, Puente A, García A, Garcia-Alba J, Espinoza J. Assessment of ecosystem  
557 services of an urbanized tropical estuary with a focus on habitats and scenarios. *PLoS ONE*  
558 2018;13(10), e0203927.
- 559 6. Biswas SR, Biswas PL, Limon SH, Yan ER, Xu MS, Khan MdSI. Plant invasion in  
560 mangrove forests worldwide. *Forest Ecol. Manage.* 2018;429:480-492.  
561 <https://doi.org/10.1016/j.foreco.2018.07.046>
- 562 7. Valiela I, Bowen JL, York JK. Mangrove forests: one of the world's threatened major  
563 tropical environments. *BioScience.* 2001;51:807-815.
- 564 8. Nehru P, Balasubramanian P. Mangrove species diversity and composition in the  
565 successional habitats of Nicobar Islands, India: A post-tsunami and subsidence scenario.  
566 *Forest Ecol. Manage.* 2018;427:70-77. <https://doi.org/10.1016/j.foreco.2018.05.063>
- 567 9. Hsieh HL, Lin HJ, Shih SS, Chen CP. Ecosystem functions connecting contributions from  
568 ecosystem services to human wellbeing in a Mangrove system in northern Taiwan. *Int. J.*  
569 *Environ. Res. Public Health.*
- 570 10. Alongi DM. Present state and future of the world's mangrove forests. *Environ. Conserv.*  
571 2002;29:331-349.
- 572 11. Mohd-Azlan J, Lawes MJ. The effect of the surrounding landscape matrix on mangrove  
573 bird community assembly in north Australia. *Biol. Conserv.* 2011;144:2134-2141.

- 574 12. Buelow CA, Baker R, Reside AE, Sheaves M. Spatial dynamics of coastal forest bird  
575 assemblages: the influence of landscape context, forest type, and structural connectivity.  
576 *Landsc. Ecol.* 2017;32:547-561.
- 577 13. Mohd-Azlan J, Noske AR, Lawes JM. The role of habitat heterogeneity in structuring  
578 mangrove bird assemblages. *Diversity.* 2015;7:118-136.
- 579 14. Zarnetske PL, Baiser B, Strecker A, Record S, Belmaker J, Tuanmu MN. The interplay  
580 between landscape structure and biotic interactions. *Curr. Landsc. Ecol. Rep.* 2017;2:12-29.
- 581 15. VanDusen B M, Fegley S R, Peterson CH. Prey distribution, physical habitat features, and  
582 guild traits interact to produce contrasting shorebird assemblages among foraging patches.  
583 *PLoS ONE* 2012;7(12), e52694.
- 584 16. Evans PR, Ward RM, Bone M, Leakey M. Creation of temperate climate intertidal  
585 mudflats: factors affecting colonization and use by benthic invertebrates and their bird  
586 predators. *Mar. Pollut. Bull.* 1999;37:535-545.
- 587 17. Nybakken JW. *Marine biology: an ecological approach.* New York, NY: Harper Collins;  
588 1993.
- 589 18. Fitzpatrick JW. Form, foraging behavior, and adaptive radiation in the tyrannidae. *Ornithol.*  
590 *Monog.* 1985;36:447-470.
- 591 19. Howe E, Simenstad CA, Ogston A. Detrital shadows: estuarine food web connectivity  
592 depends on fluvial influence and consumer feeding mode. *Ecological Applications.*  
593 2017;27:2170-2193.
- 594 20. Jumars PA, Nowell ARM. Fluid and sediment dynamic effects on marine benthic  
595 community structure. *Am. Zool.* 1984;24:45-55. <https://doi.org/10.1093/icb/24.1.45>
- 596 21. Rhoads D, Young DK. The influence of deposit-feeding organisms on sediment stability  
597 and community trophic structure. *J. Mar. Res.* 1970;28:150-178.
- 598 22. Sanders HL. Benthic studies in Buzzards Bay. I. Animal-sediment relationships. *Limnol.*  
599 *Oceanogr.* 1958;3:245-258.
- 600 23. Snelgrove PVR, Butman CA. Animal-sediment relationships revisited: cause versus effect.  
601 *Oceanogr. Mar. Biol. Ann. Rev.* 1994;2:111-177.
- 602 24. Holmes RT, Robinson SK. Tree species preferences of foraging insectivorous birds in a  
603 northern Hardwoods forest. *Oecologia.* 1981;48:31-35.

- 604 25. Hsueh ML, Lee HH. Diversity and distribution of the Mangrove forests in Taiwan. *Wetl.*  
605 *Ecol. Manag.* 2000;8:233-242.
- 606 26. Sheue CR, Liu HY, Jean WHY. *Kandelia obovata* (Rhizophoraceae), a new Mangrove  
607 species from Eastern Asia. *Taxon.* 2003;52:287-294.
- 608 27. Shih SS, Hwang GW, Huang SC. The ecological resources monitoring in Wazihwei Nature  
609 Reserve, New Taipei City, Taiwan: New Taipei City Government; 2015.
- 610 28. Shih SS, Chen CP, Hsieh HL, Lin HJ. Driving forces for the landscape evolution of riverine  
611 mangroves. In: Poster presentation in the 10th intecol international wetlands conference.  
612 Changshu, China: Intecol; 2016.
- 613 29. Taiwan Wetland Society. The ecological resources monitoring and social-economic survey  
614 in the Wazihwei Nature Reserve, Final Report. New Taipei City, Taiwan: New Taipei City  
615 Government; 2017.
- 616 30. Chow VT. Open-channel hydraulics. Boston, MA: McGraw-Hill; 1988.
- 617 31. Donnell BP. Users guide to RMA2, Version 4.3. Vicksburg, MS: US Army, Engineer  
618 Research and Development Center, Waterways Experiment Station Coastal and Hydraulics  
619 Laboratory; 1997.
- 620 32. White FM. Viscous fluid flow. New York, NY: McGraw-Hill; 1991.
- 621 33. Cowan WL. Estimating hydraulic roughness coefficients. *Agric. Eng.* 1956;377:473-475.
- 622 34. Lee HY, Shih SS. Impacts of vegetation changes on the hydraulic and sediment transport  
623 characteristics in Guandu Mangrove Wetland. *Ecol. Eng.* 2004;23:85-94.
- 624 35. King I. Users guide to RMA4. Version 4.5. Vicksburg, MS: US Army, Engineer Research  
625 and Development Center, Waterways Experiment Station Coastal and Hydraulics  
626 Laboratory; 2003.
- 627 36. Hsieh HL, Chang KH. Habitat characteristics and occurrence of the spionid  
628 *Pseudopolydora* sp. on the tube-caps of the onuphid *Diopatra bilobata* (Polychaeta:  
629 Spionidae, Onuphidae). *Bull. Inst. Zool. Acad. Sin.* 1991;30:331-339
- 630 37. ter Braak CJF. Ordination, In: Jongman RHG, ter Braak CJF, van Tongeren OFR, editors.  
631 Data analysis in community and landscape ecology. Cambridge, MA: Cambridge University  
632 Press; 1995. pp. 91-173.

- 633 38. Cruz-Castillo JG, Ganeshanandam S, MacKay BR, Lawes GS, Lawoko CRO, Woolley DJ.  
634 Applications of canonical discriminant analysis in horticultural research. HortScience.  
635 1994;29:1115-1119.
- 636 39. ter Braak CJF, Smilauer P. CANOCO reference manual and CanoDraw for windows user's  
637 guide: software for canonical community ordination (version 4.5). Ithaca, NY:  
638 Microcomputer Power; 2002.
- 639 40. SAS Institute. SAS user's guide: statistics, release 9.1. Cary, NC: SAS Institute; 2003.
- 640 41. ter Braak CJF, Smilauer P. CANOCO reference manual and user's guide: software for  
641 ordination, version 5.0. Ithaca, NY: Microcomputer Power; 2012.
- 642 42. Hossain MB, Marshall D.J, Venkatramanan S. Sediment granulometry and organic matter  
643 content in the intertidal zone of the Sungai Brunei estuarine system, northwest coast of  
644 Borneo. Carpathian J. Earth Environ. Sci. 2014;9:231-239,
- 645 43. Dauer DM, Ewing RM. Functional morphology and feeding behavior of *Malacoceros*  
646 *indicus* (Polychaeta: Spionidae). Bull. Mar. Sci. 1991;48:395-400
- 647 44. Jumars PA, Dorgan KM, Lindsay SM. Diet of worms emended: an update of polychaete  
648 feeding guilds. Ann. Rev. Mar. Sci. 2015;7:497-520.
- 649 45. Hsieh HL, Chen CP, Chen YG, Yang HH. Diversity of benthic organic matter flows  
650 through polychaetes and crabs in a mangrove estuary:  $\delta^{13}\text{C}$  and  $\delta^{34}\text{S}$  signals. Mar. Ecol.  
651 Prog. Ser. 2002;227:145-155.
- 652 46. Read GB. Persistence of infaunal polychaete zonation patterns on a sheltered, intertidal sand  
653 flat. N. Z. J. Mar. Freshw. Res. 1984;18:399-416.
- 654 47. Beesley PL, Ross GJB, Glasby CJ. Fauna of Australia - Volume 4A polychaetes & allies,  
655 Australian Biological Resources Study. Canberra, Australia: CSIRO Publishing; 2000.
- 656 48. Perkins EJ. The hardness of the soil of the shore at Whitstable, Kent. J. Ecol. 1958;46:71-  
657 81.
- 658 49. Lee YL, Glasby C. A new cryptic species of *Neanthes* (Annelida: Phyllodocida: Nereididae)  
659 from Singapore confused with *Neanthes glandicineta* Southern, 1921 and *Ceratonereis*  
660 (*Composetia*) *burmensis* (Monro, 1937). Raffles. Bull. Zool. 2015;75-95.
- 661 50. Rhoads DC. Mass properties, stability, and ecology of marine muds related to burrowing  
662 activity. In: Crimes TP, Marper JC, editors. Trace fossils. Liverpool: Seel House Press;  
663 1970. pp. 391-406.



- 664 51. Hsieh HL. Spatial and temporal patterns of polychaete communities in a subtropical  
665 mangrove swamp: influences of sediment and microhabitat. *Mar. Ecol. Prog. Ser.*  
666 1995;127:157-167.
- 667 52. Hsieh HL, Hsu CF. Differential recruitment of annelids onto tidal elevations in an estuarine  
668 mud flat. *Mar. Ecol. Prog. Ser.* 1999;177:93-102. <https://doi.org/10.3354/meps177093>
- 669 53. Ma Z, Cai Y, Li B, Chen J. Managing wetland habitats for waterbirds: an international  
670 perspective. *Wetlands* 2010;30:15-27.
- 671 54. Whittingham MJ, Percival SM, Brown AF. Time budgets and foraging of breeding golden  
672 plover *Pluvialis apricaria*. *J. Appl. Ecol.* 2000;37:632-646.
- 673 55. Burger J, Niles L, Clar K.E. Importance of beach, mudflat and marsh habitats to migrant  
674 shorebirds on Delaware Bay. *Biol. Conserv.* 1997;79:283-292.
- 675 56. Larson C. *Hostile shores*. Cambridge: Cambridge University Press; 2015.
- 676 57. Straw P, Saintilan N. Loss of shorebird habitat as a result of mangrove incursion due to sea-  
677 level rise and urbanization. In: Boere GC, Galbraith CA, Stroud DA. editors. *Waterbirds*  
678 *around the world*. Edinburgh, UK: The Stationery Office; 2006. pp. 717-720.
- 679 58. Azman NM, Latip NS, Sah SA, Akil MA, Shafie NJ, Khairuddin NL. Avian diversity and  
680 feeding guilds in a secondary forest, an oil palm plantation and a paddy field in riparian  
681 areas of the Kerian River basin, Perak, Malaysia. *Trop Life Sci. Res.* 2011;22:45-64.
- 682 59. Izhaki I. A comparative analysis of the nutritional quality of mixed and exclusive fruit diets  
683 for yellow-vented bulbuls. *Condor.* 1992;94:912-923.
- 684 60. Liang QJ, Zhao L, Wang JQ, Chen Q, Zheng WH, Liu JS. Effect of food restriction on the  
685 energy metabolism of the Chinese bulbul (*Pycnonotus sinensis*). *Dongwuxue Yanjiu*  
686 2015;36:79-87.
- 687 61. Yoshikawa T, Osada Y. Dietary compositions and their seasonal shifts in Japanese resident  
688 birds, estimated from the analysis of volunteer monitoring data. *PLoS ONE.* 2015;10,  
689 e0119324. <https://doi.org/10.1371/journal.pone.0119324>
- 690 62. Field RH, Anderson GQA, Guar DJ. Land-use correlates of breeding performance and diet  
691 in Tree Sparrows *Passer montanus*. *Bird Study.* 2008;55:280-289.
- 692 63. McHugh NM, Prior M, Leather SR, Holland JM. The diet of Eurasian Tree Sparrow *Passer*  
693 *montanus* nestlings in relation to agri-environment scheme habitats. *Bird Study.* 2016;63:  
694 279-283.

- 695 64. Hamilton LS, Snedaker SC. Handbook for Mangrove area management, Hawaii; The  
696 Institute, Honolulu; 1984.
- 697 65. Shao KT, Lee SC, Maa CJ, Chen CP, Jan RQ, Severinghaus, et al. The development of an  
698 ecological monitoring system for the Danshuei estuary, The third year report of Academia  
699 Sinica Thematic Research Project. Taipei, Taiwan: Academia Sinica; 2002.
- 700 66. Fleischer RC. Relationships between tidal oscillations and ruddy turnstone flocking,  
701 foraging, and vigilance behavior. *Condor*. 1983;85:22-29.
- 702 67. Custer TW, Osborn RG. Feeding habitat use by colonially-breeding herons, egrets, and  
703 ibises in North Carolina. *Auk*. 1978;95:733-743.
- 704 68. Gibbs JP. Spatial relationships between nesting colonies and foraging areas of great blue  
705 herons. *Auk*. 1991;108:764-770. <https://doi.org/10.1093/auk/108.4.764>
- 706 69. Jakubas D. Factors affecting the breeding success of the grey heron (*Ardea cinerea*) in  
707 northern Poland. *J. Ornithol.* 2005;146:27-33. <https://doi.org/10.1007/s10336-004-0051-8>
- 708 70. Thompson DH. Feeding areas of great blue herons and great egrets nesting within the  
709 floodplain of the upper Mississippi River. *Proc. Colonial. Waterbird Group*. 1979;2:202-  
710 213.
- 711 71. Shih SS, Yang SC, Lee HY, Hwang GW, Hsu YM. Development of a salinity-secondary  
712 flow-approach model to predict mangrove spreading. *Ecol. Eng.* 2011;37:1174-1183.
- 713
- 714 72. Agriculture, Fisheries and Conservation Department. Mai Po Inner Deep Bay Ramsar site  
715 management plan. Hong Kong: AFCDC; 2011.
- 716 73. Lee SY, Primavera JH, Dahdouh-Guebas F, McKee K, Bosire JO, Cannicci S, Diele K., et  
717 al. Ecological role and services of tropical mangrove ecosystems: a reassessment. *Glob.*  
718 *Ecol. Biogeogr.* 2014;23:726-743.
- 719 74. Alongi DM, Pfitzner J, Trott LA, Tirendi F, Dixon P, Klumpp DW. Rapid sediment  
720 accumulation and microbial mineralization in forests of the mangrove *Kandelia candel* in  
721 the Jiulongjiang Estuary, China. *Estuar. Coast Shelf Sci.* 2005;63:605-618.

## 722 **Supporting information captions**

723 **S1 Table. Transformation formulae used for the physical and biotic variables measured at the Wazihwei**  
724 **Nature Reserve wetland in the Danshuei estuary during 2013-2015.**

725 **S2 Table. Counts of each species and the species composition of the avian guilds recorded in the Wazihwei**  
726 **wetland in the Danshuei estuary, northern Taiwan, during 2013-2015.**

727 **S3 Table. Means and ranges of geomorphological, hydrological and sedimentary variables measured at**  
728 **Wazihwei wetland in the Danshuei estuary, northern Taiwan, during 2013-2015.** N = sample size, SE =  
729 standard error.

730 **S4 Table. Means and ranges of geomorphological, hydrological and sedimentary variables measured in each**  
731 **zone of the Wazihwei Nature Reserve wetland in the Danshuei estuary, northern Taiwan, during 2013-2015.**

732 N = sample size, SE = standard error, ranges from minimal to maximal values are shown in parentheses, inLF,  
733 inMF, inHF= inner low, intermediate and high inundation flat, respectively, Outer= outer flat.

734 **S5 Table. Differences in the geomorphological, hydrological and sedimentary variables between two**  
735 **subgroups in the inner high inundation (inHF) zone of the Wazihwei Nature Reserve wetland in the Danshuei**  
736 **estuary, northern Taiwan, during 2013-2015.** Examination used the Wilcoxon 2-sample test. One subgroup  
737 consists of Stations 1, 2, and 3; the other subgroup represents Station 4. N = sample size, SE = standard error.

738 **S6 Table. Density (mean  $\pm$  SE individuals m<sup>-2</sup>) and density differences of 6 dominant polychaete species**  
739 **measured in each zone of the Wazihwei Nature Reserve wetland in the Danshuei estuary, northern Taiwan,**

740 **during 2013-2014.** Density ranges from minimal to maximal values are shown in parentheses. Differences in means  
741 among zones were examined using the Kruskal-Wallis test. N = sample size, inLF, inMF, inHF= inner low,  
742 intermediate and high inundation flat, respectively, Outer= outer flat. n.s.= not significant at 0.05.

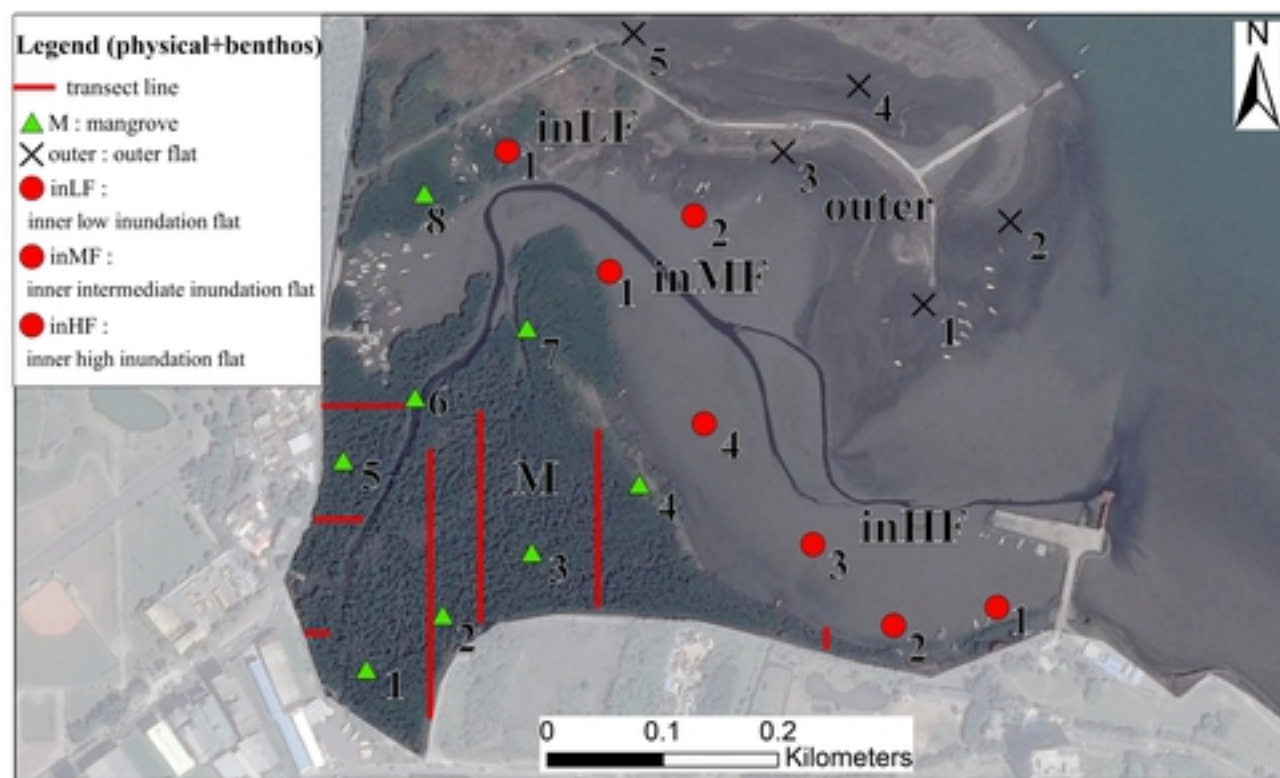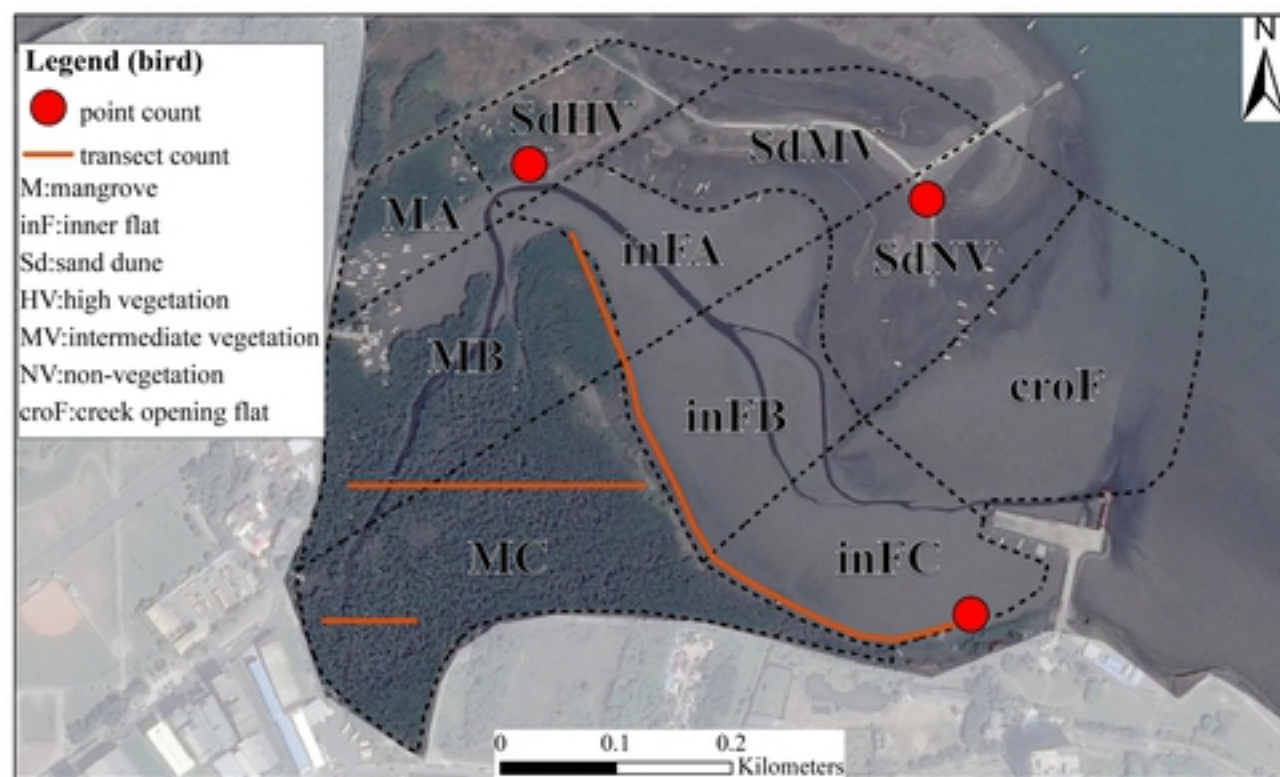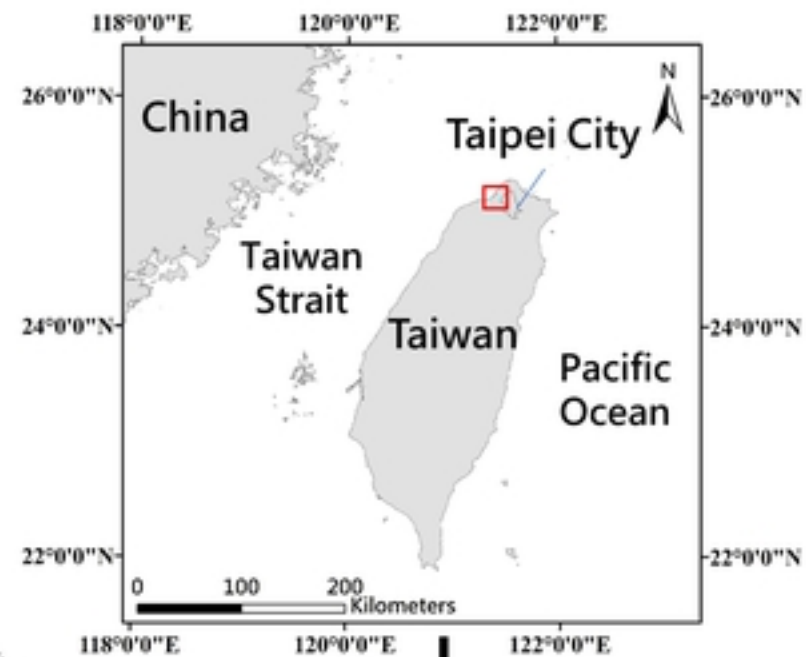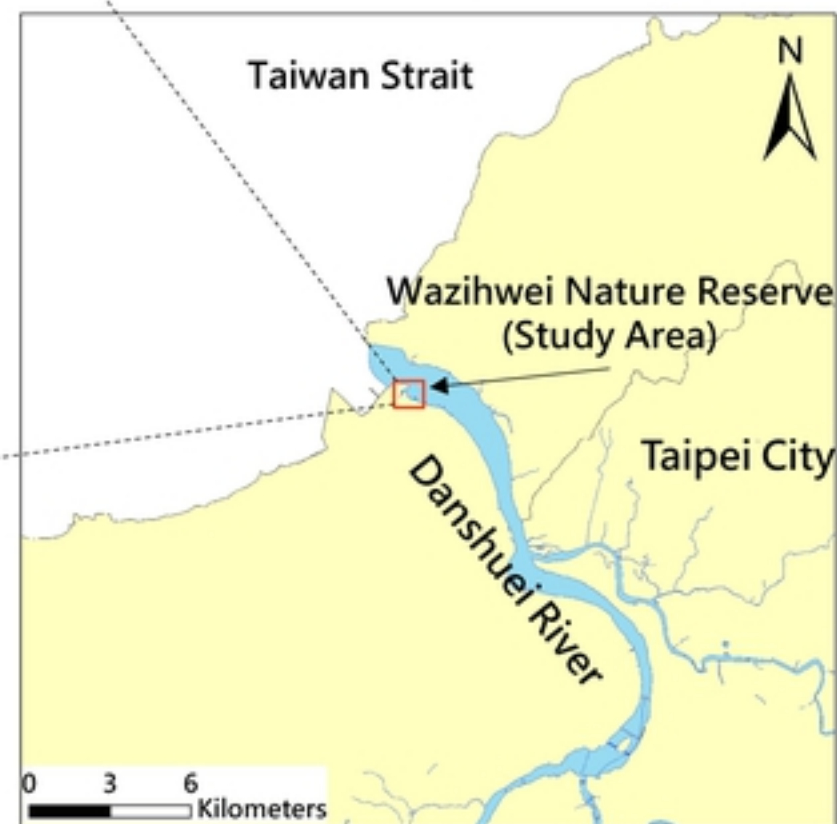

Fig 1



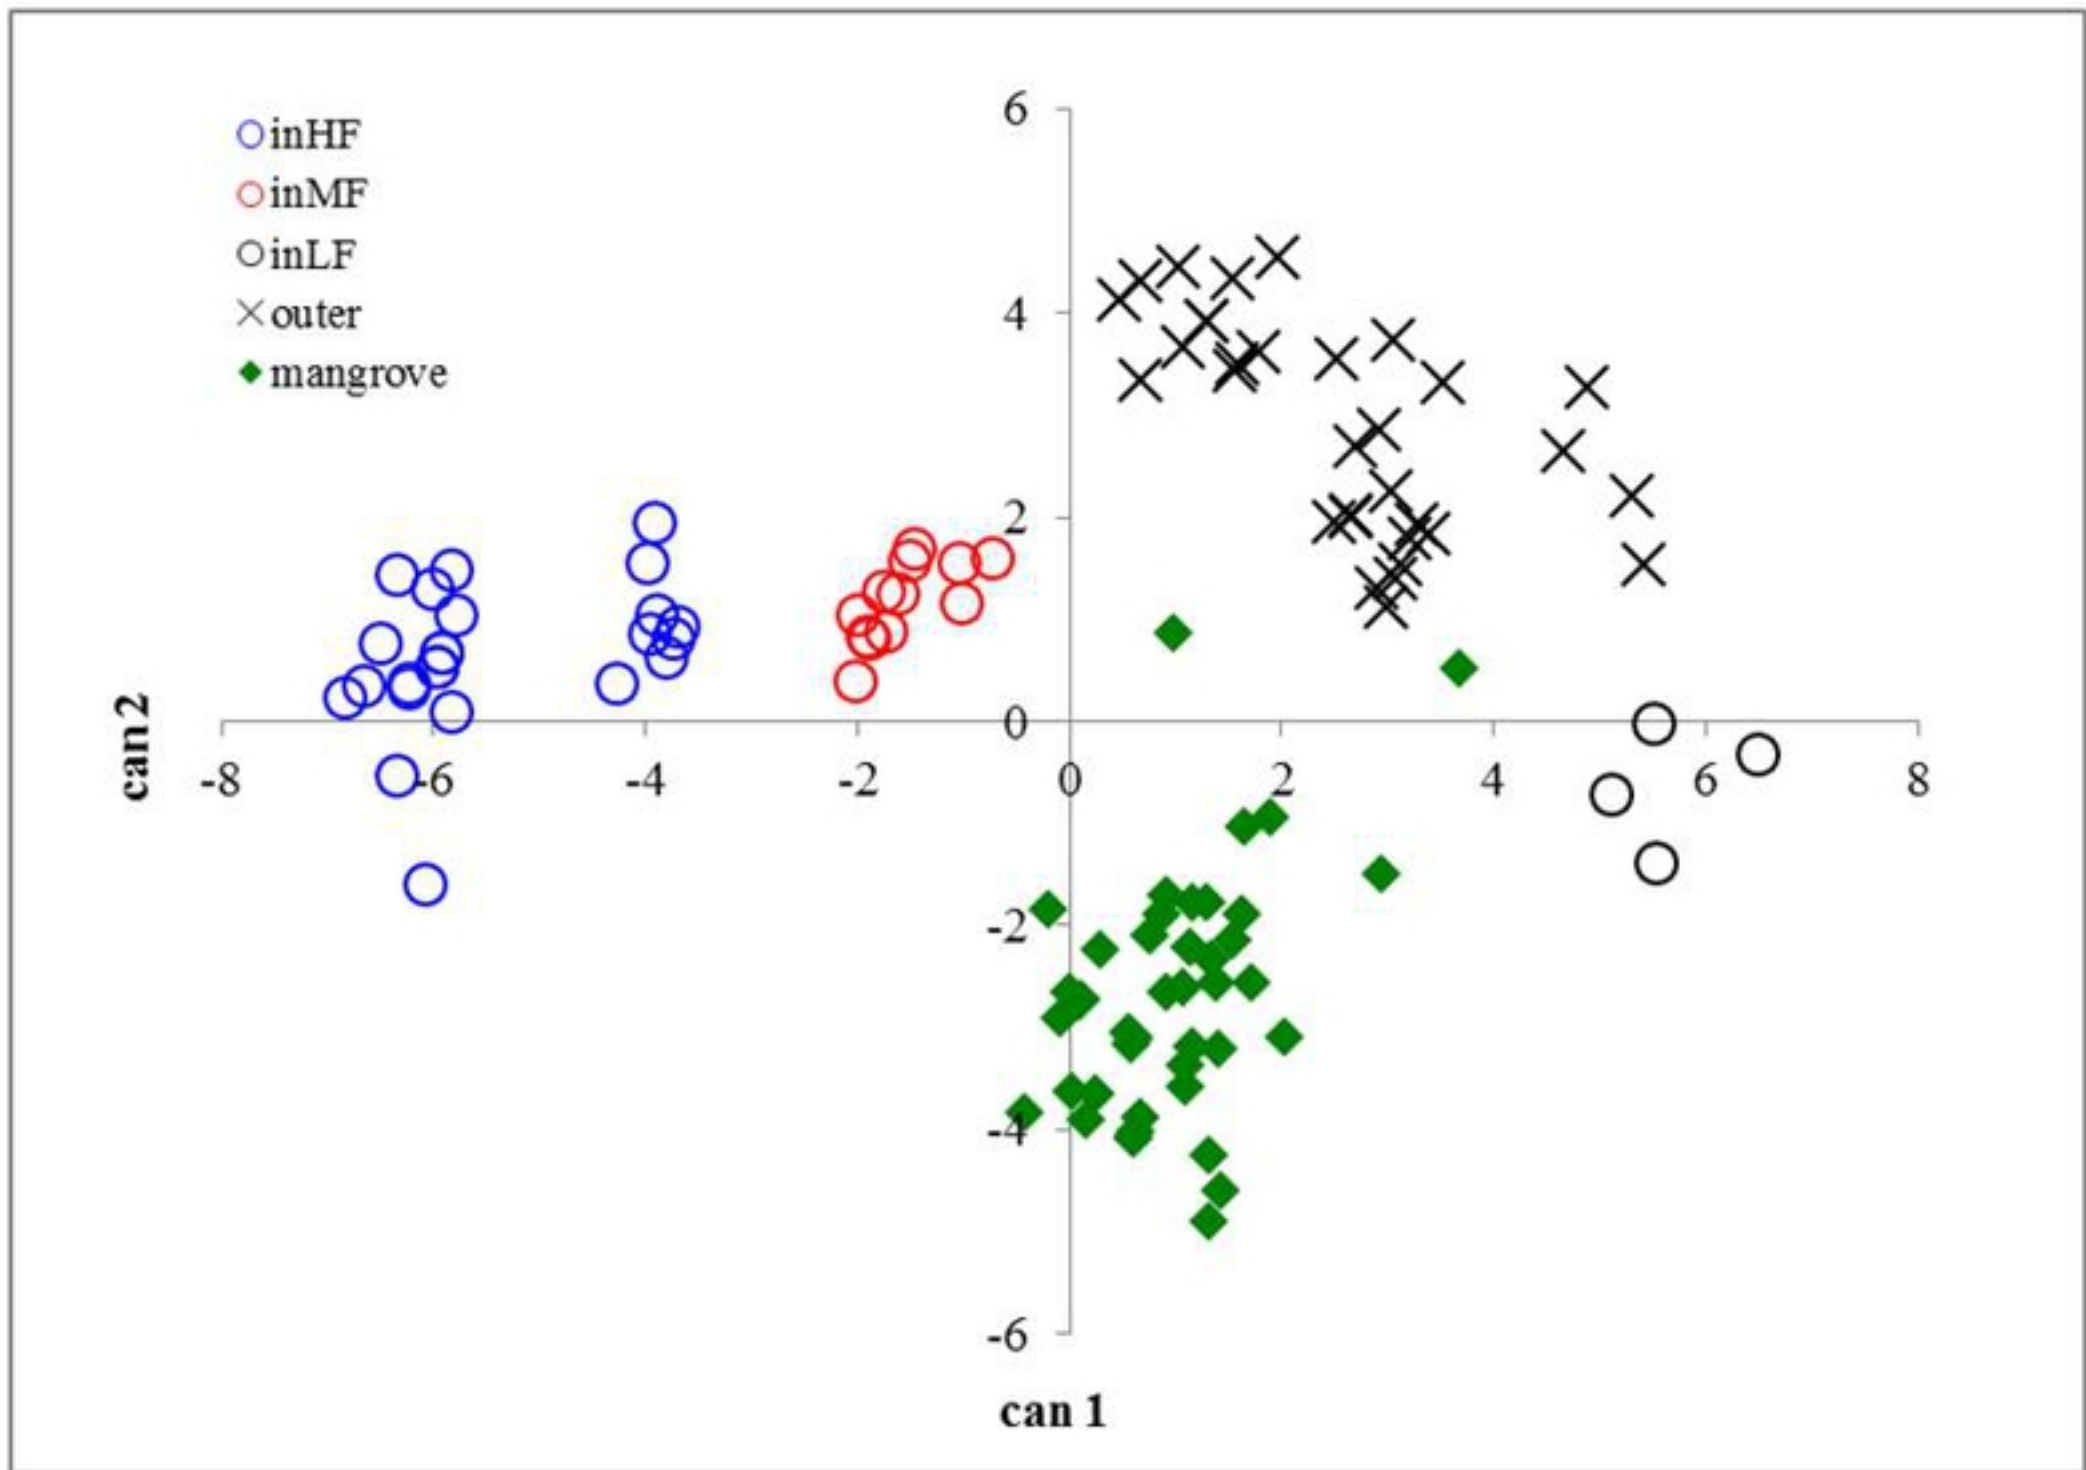

Fig 2A

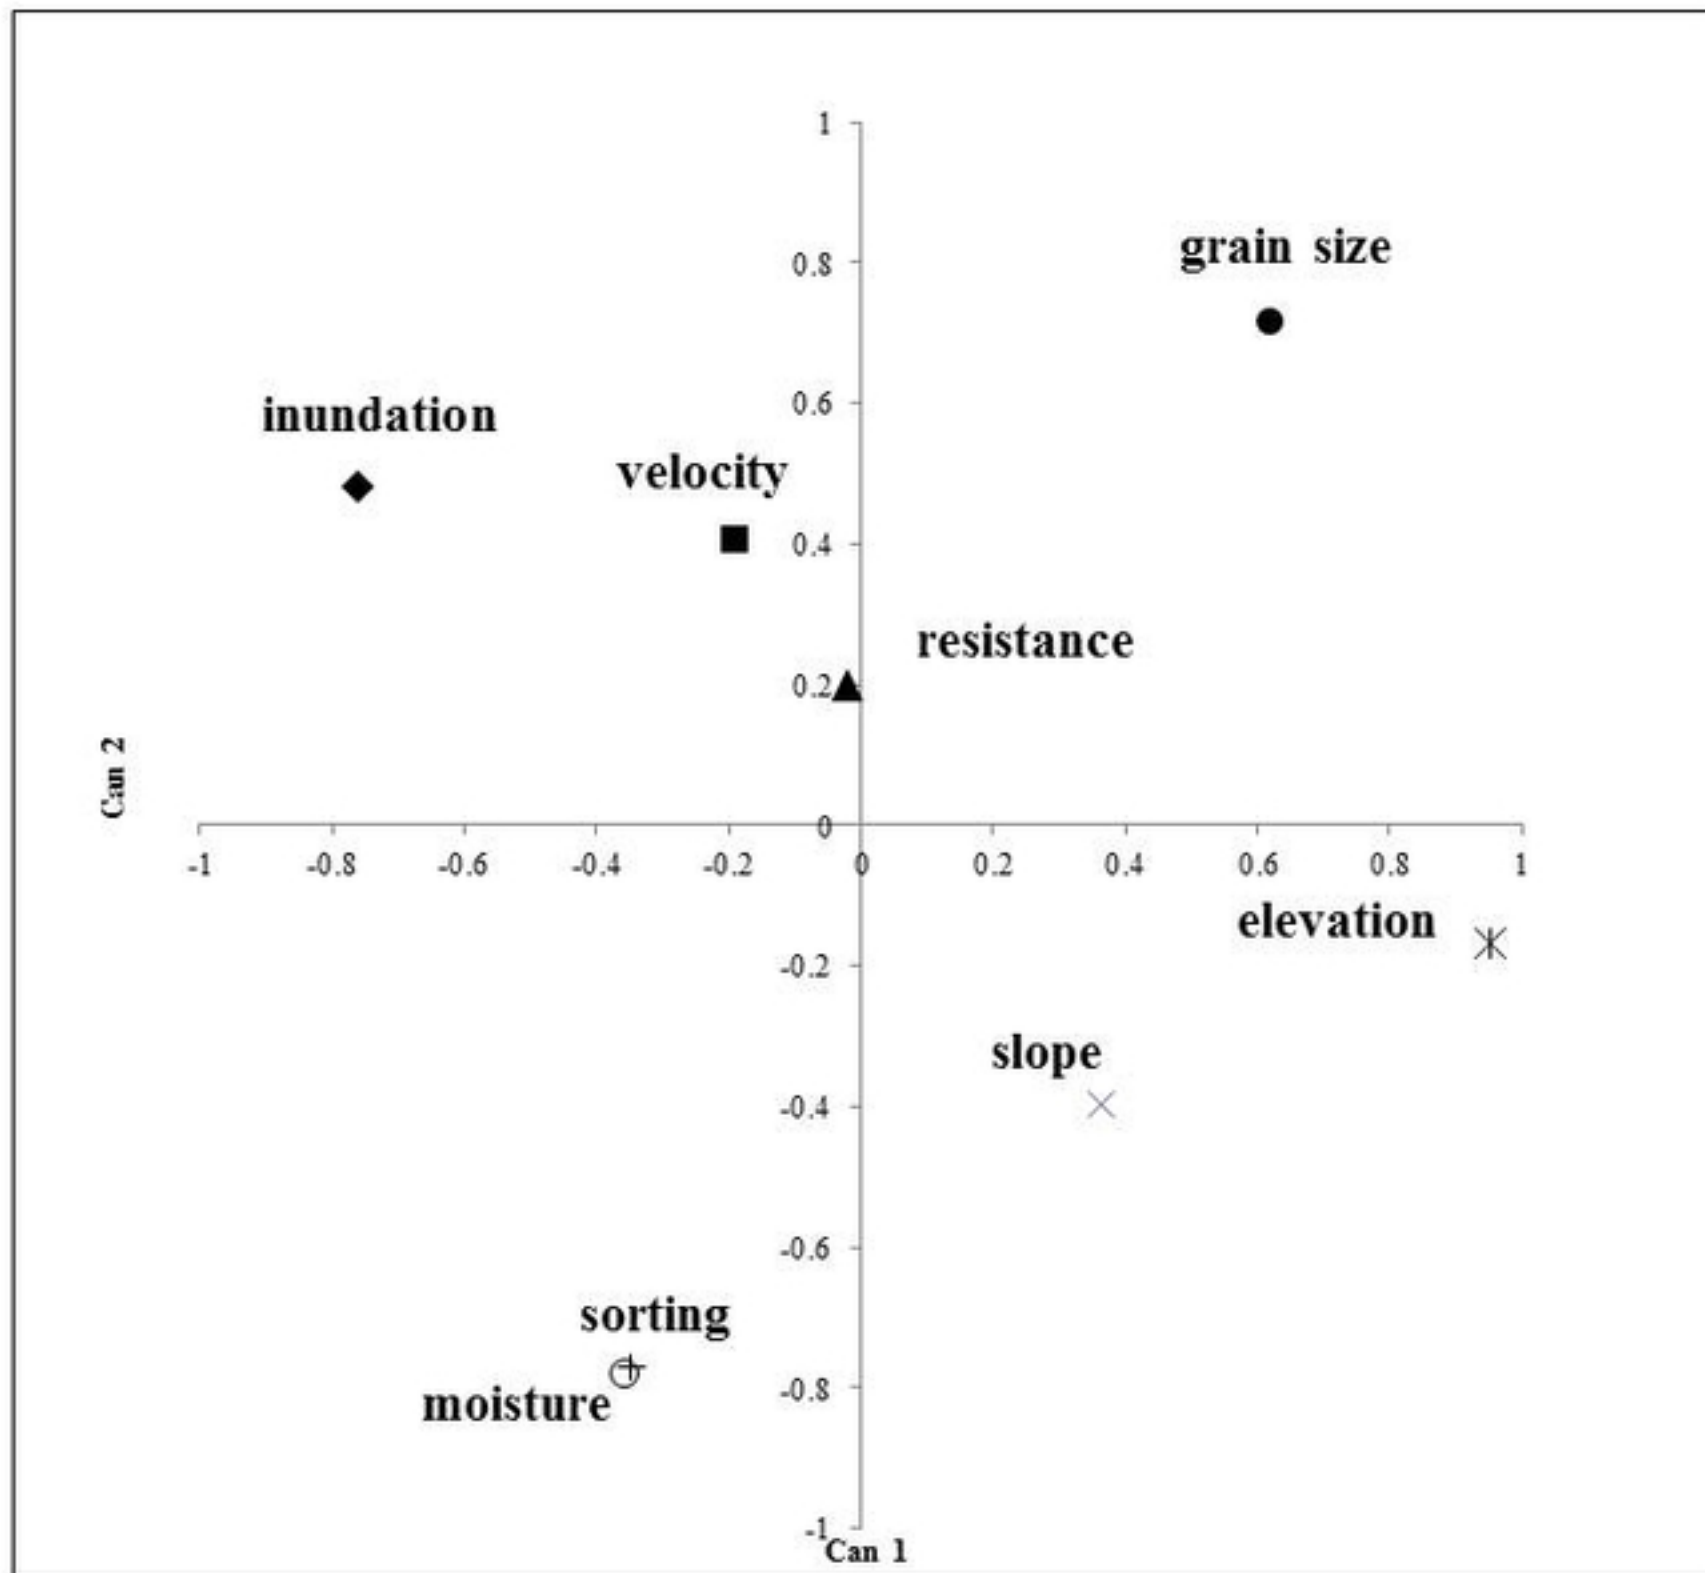

Fig 2B





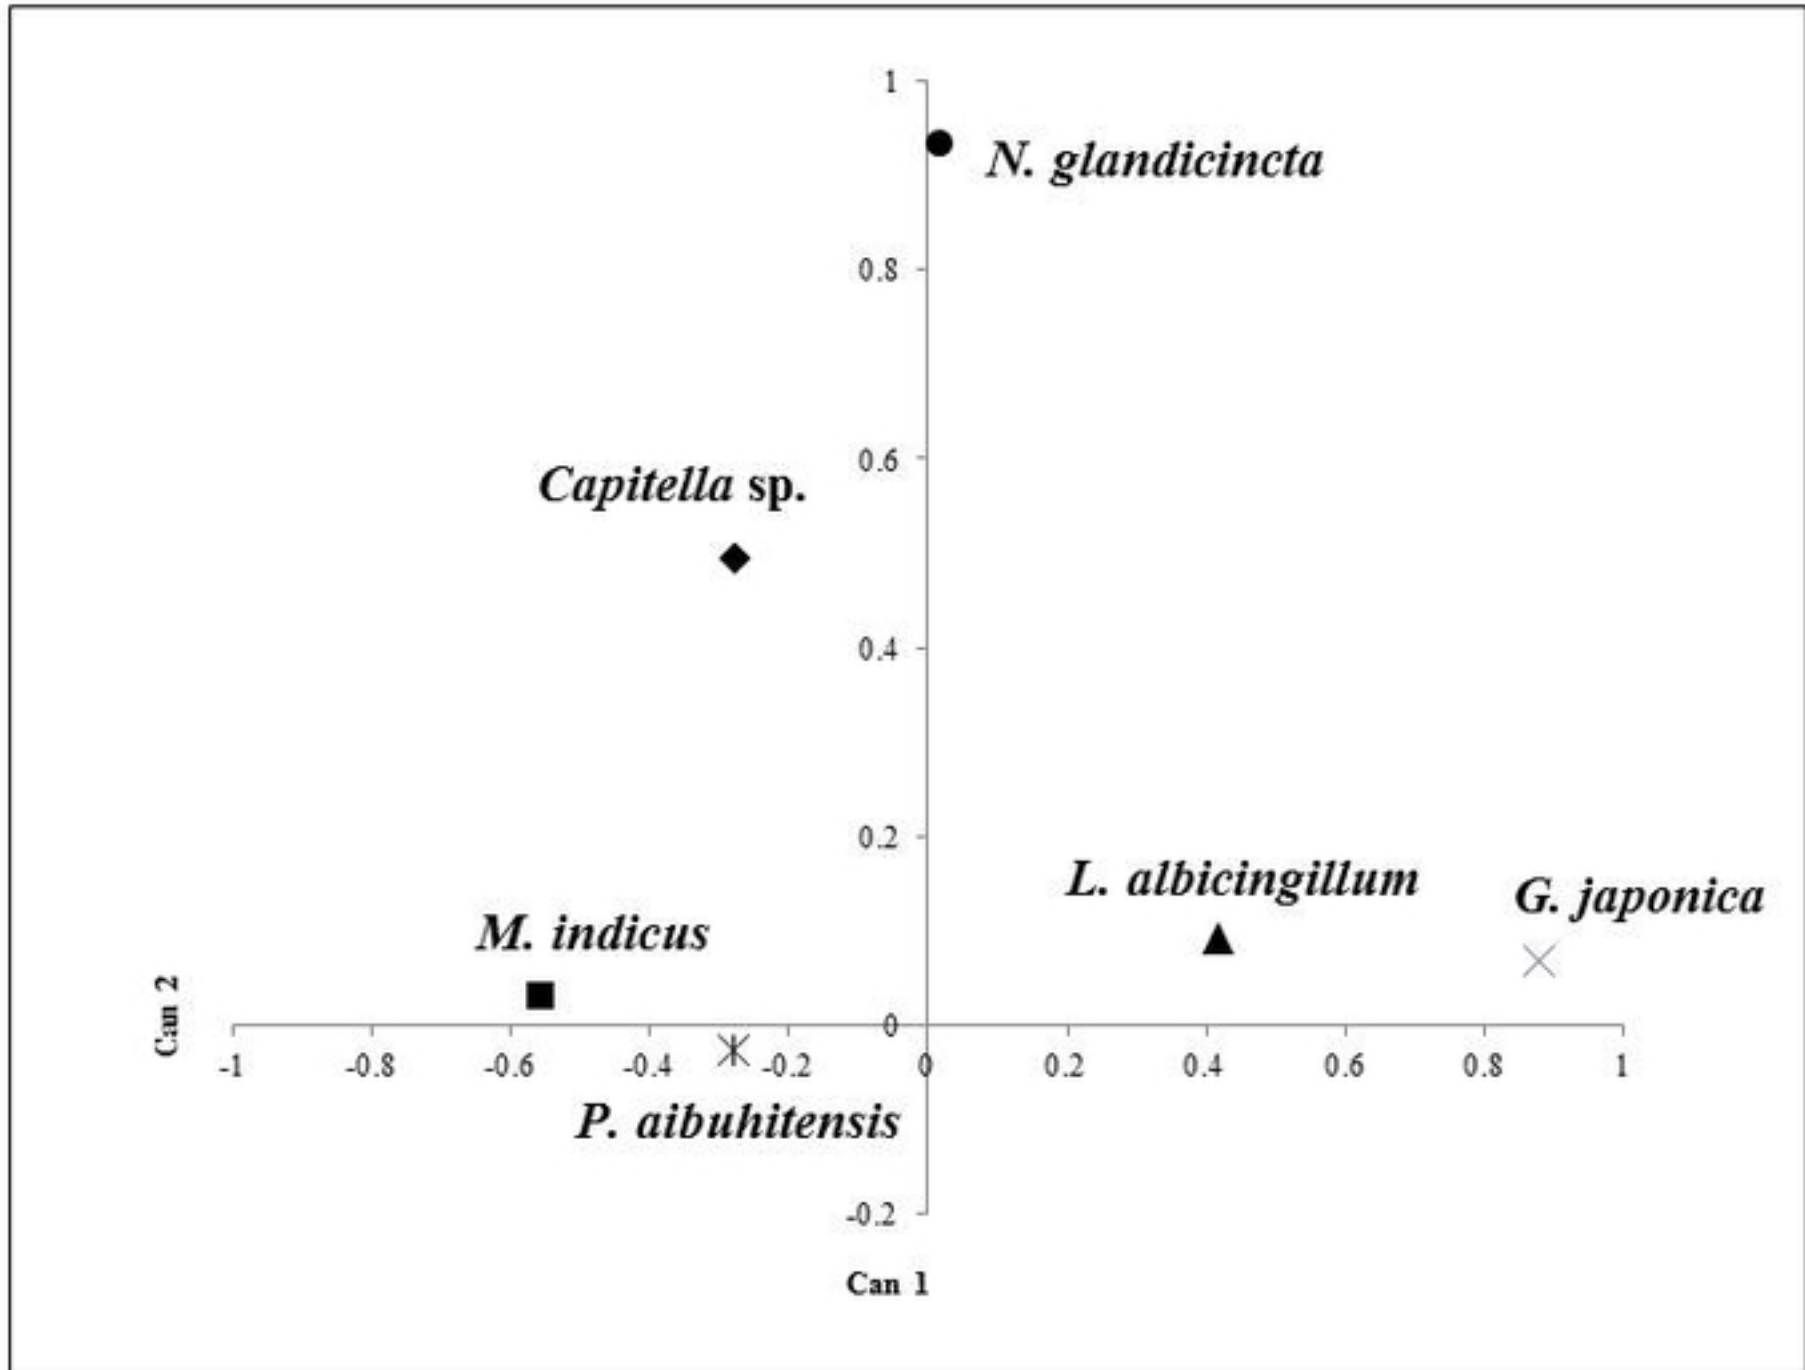

Fig 3B

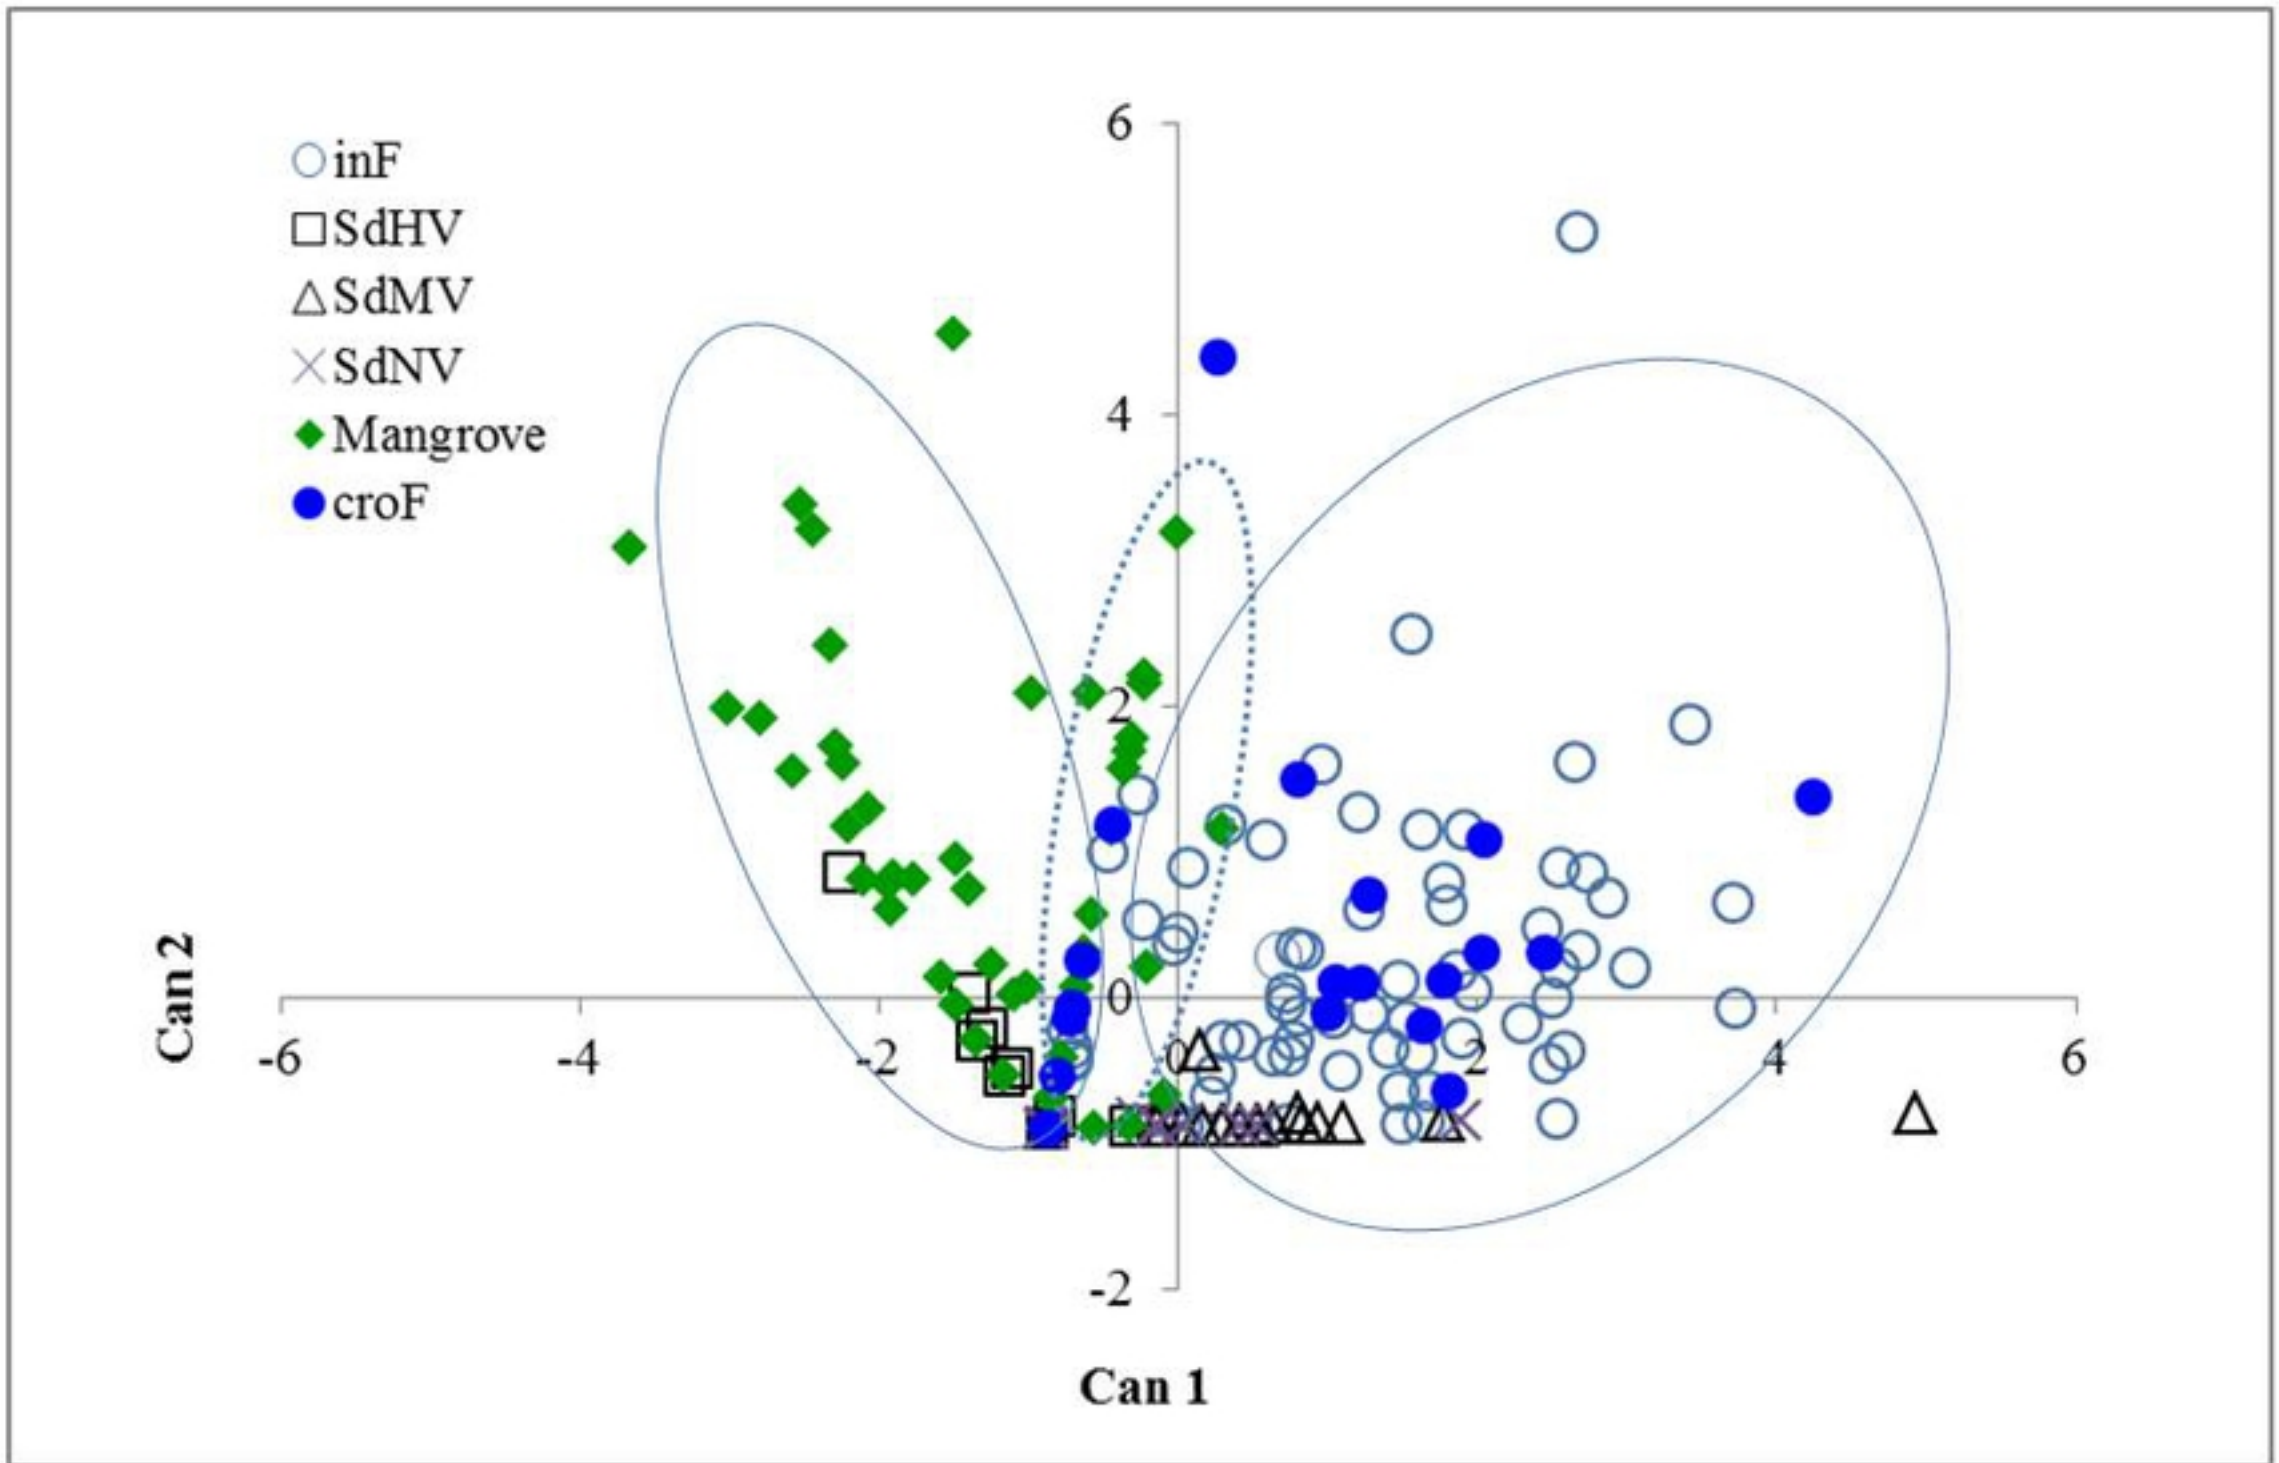

Fig 4A

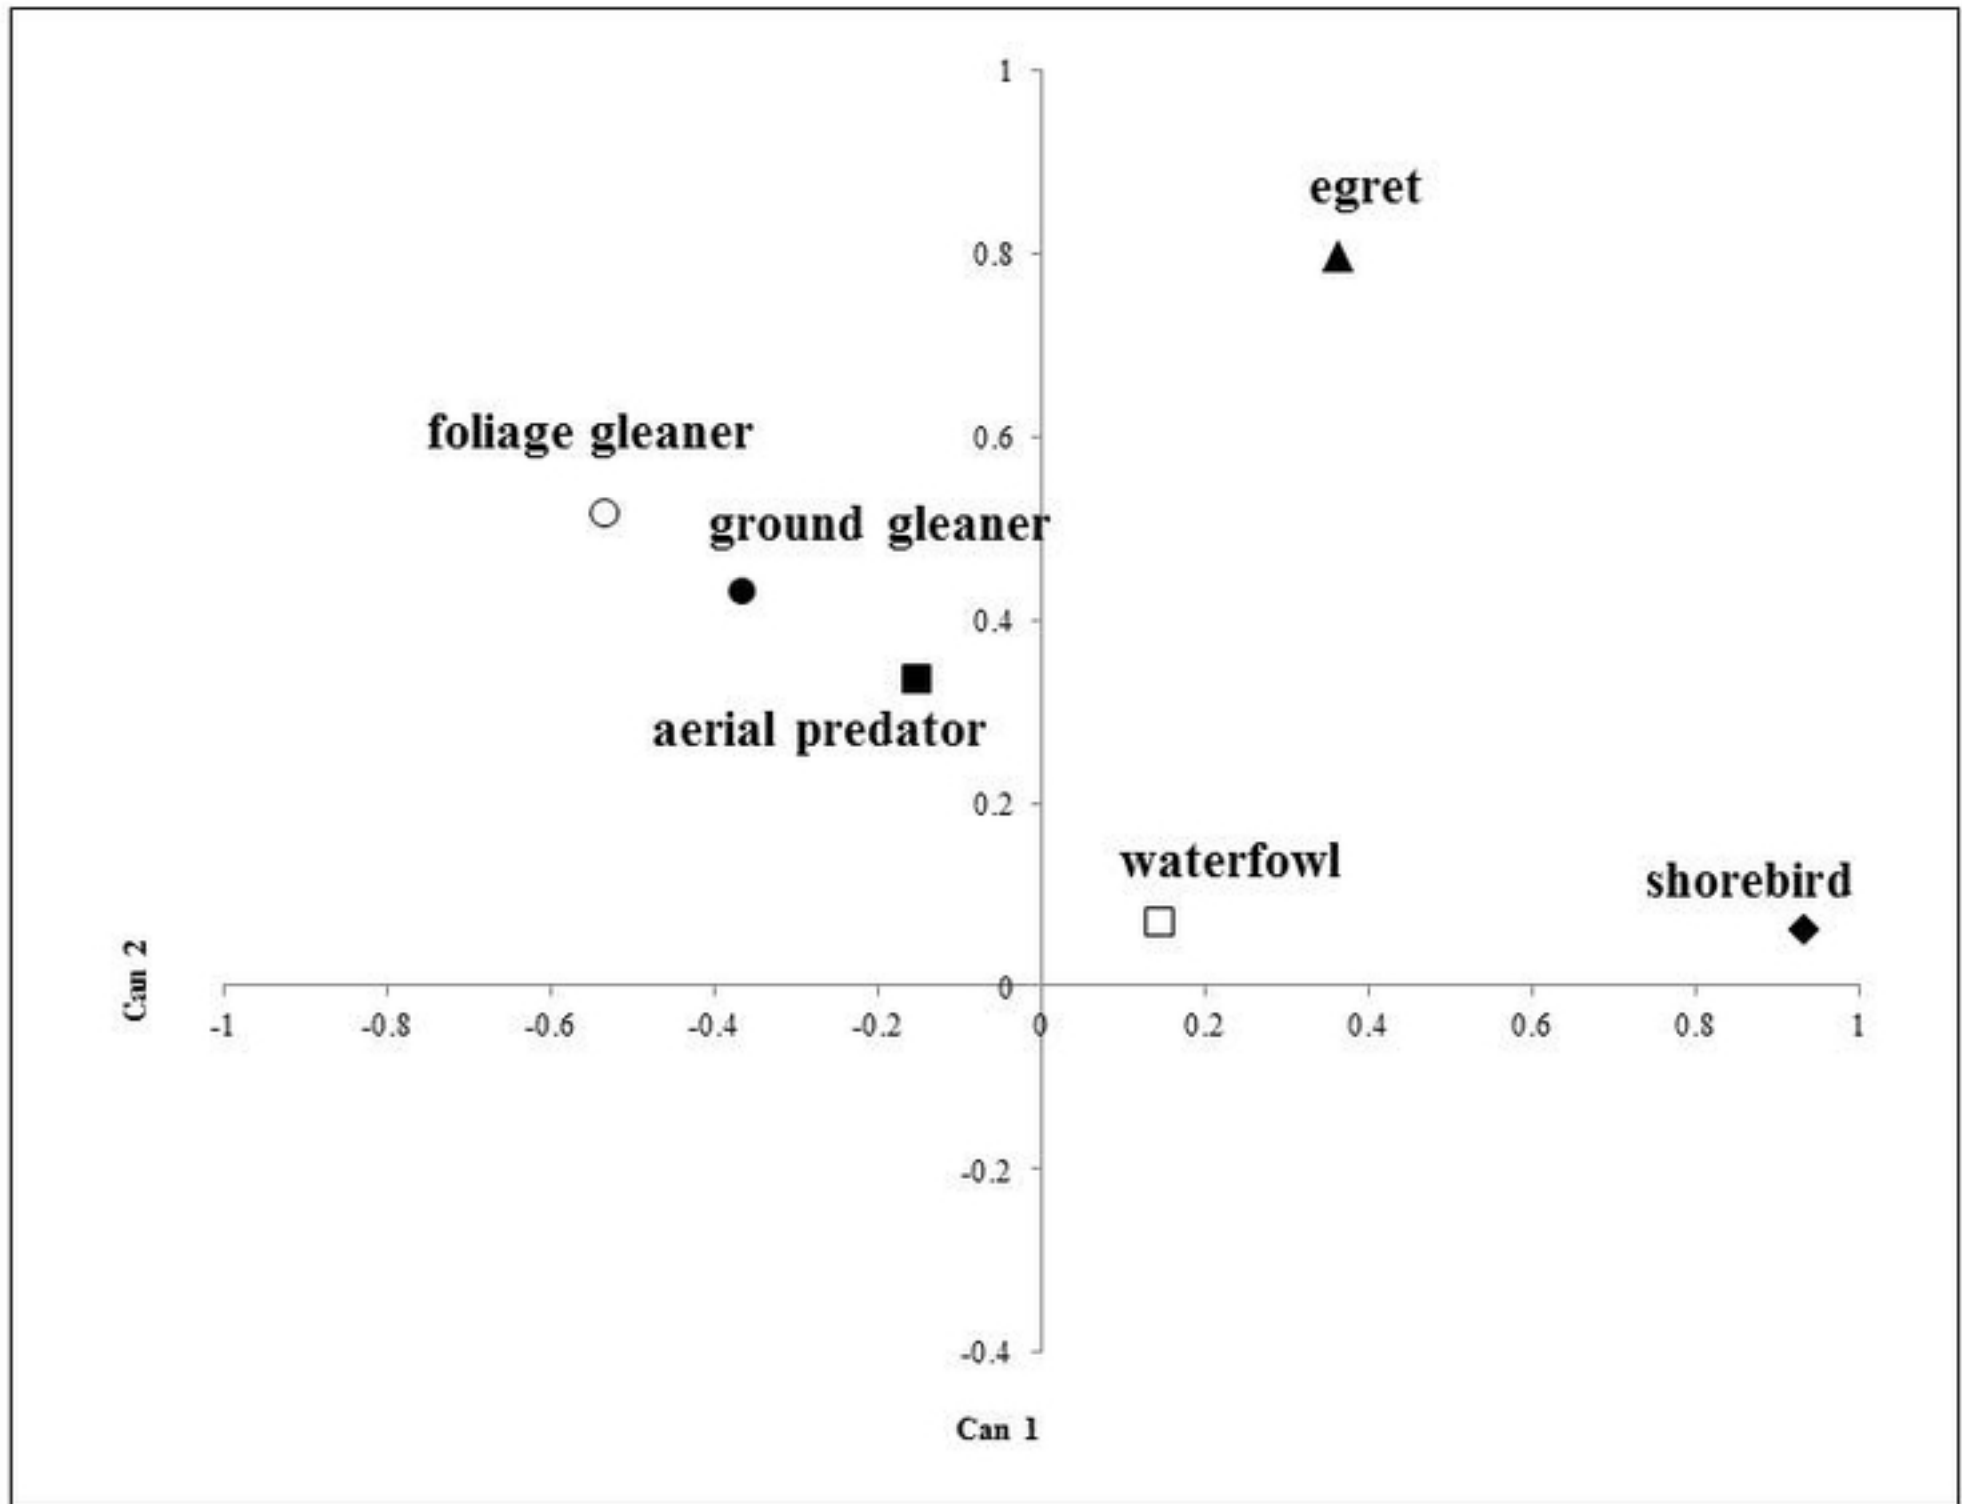

Fig 4B

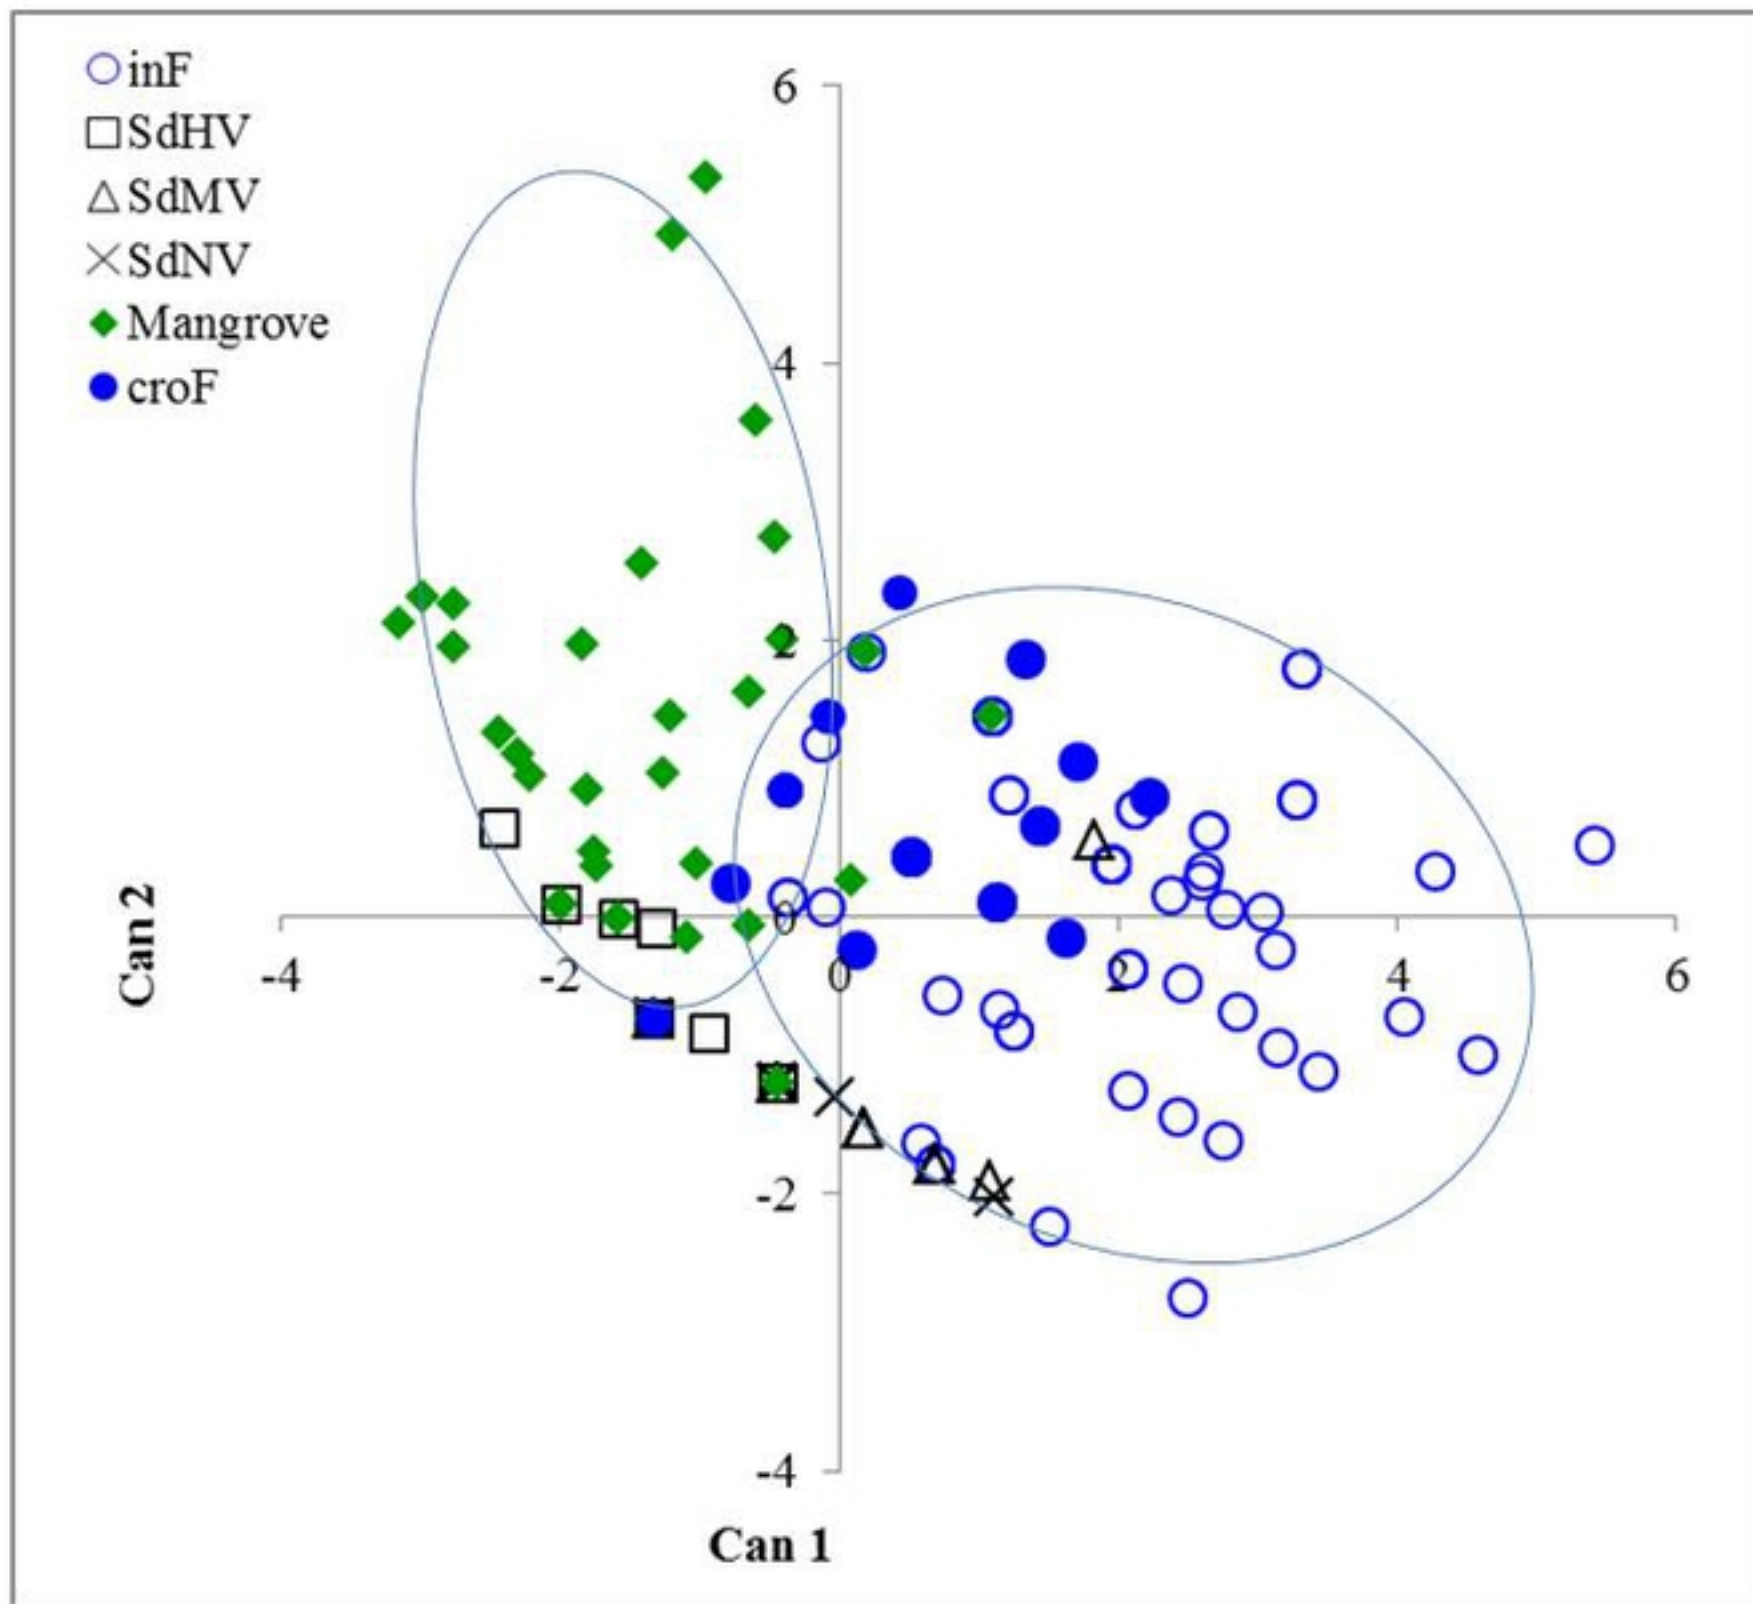

Fig 5A

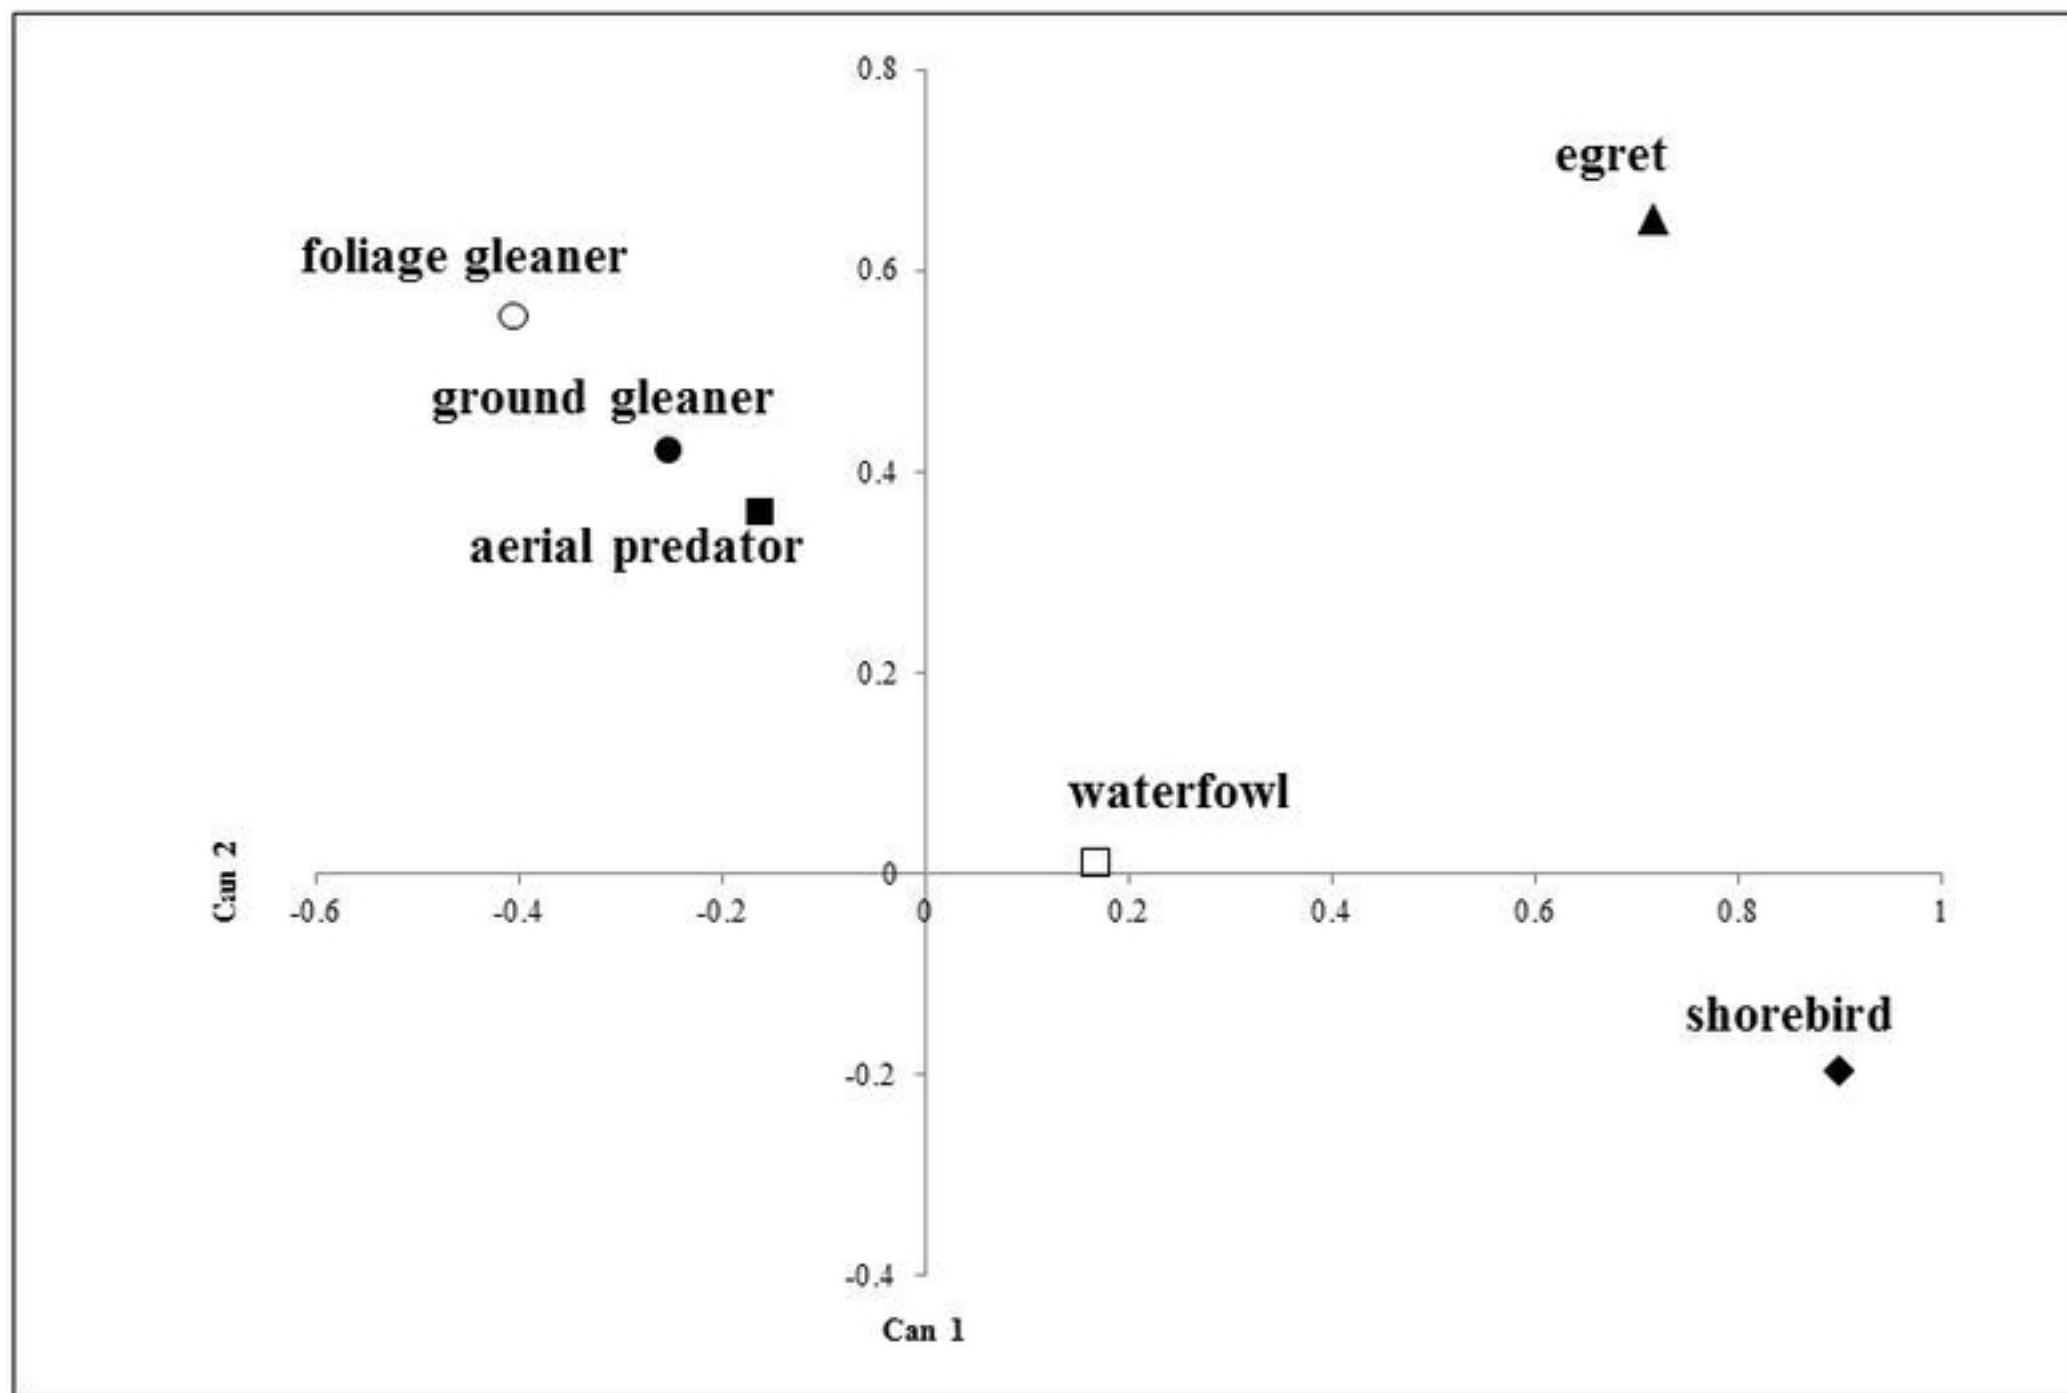

Fig 5B

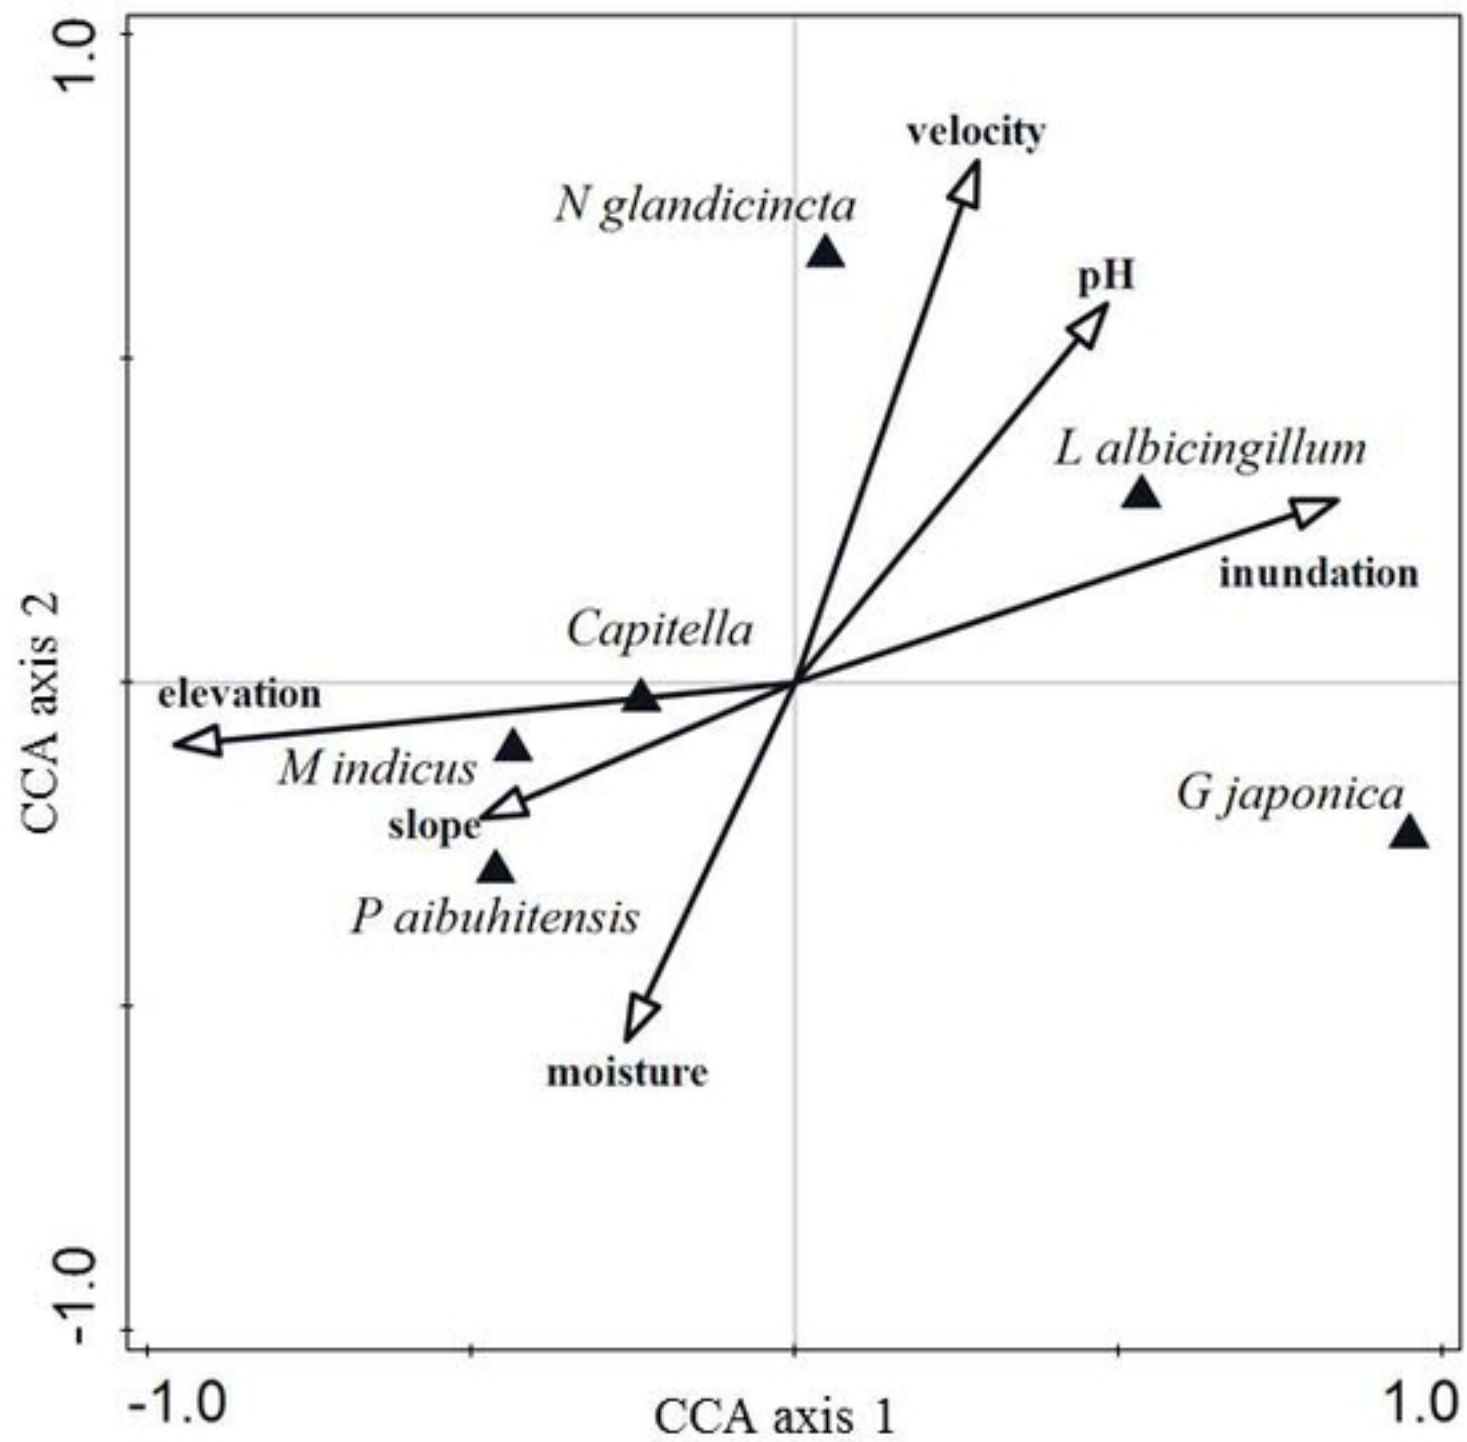

Fig 6

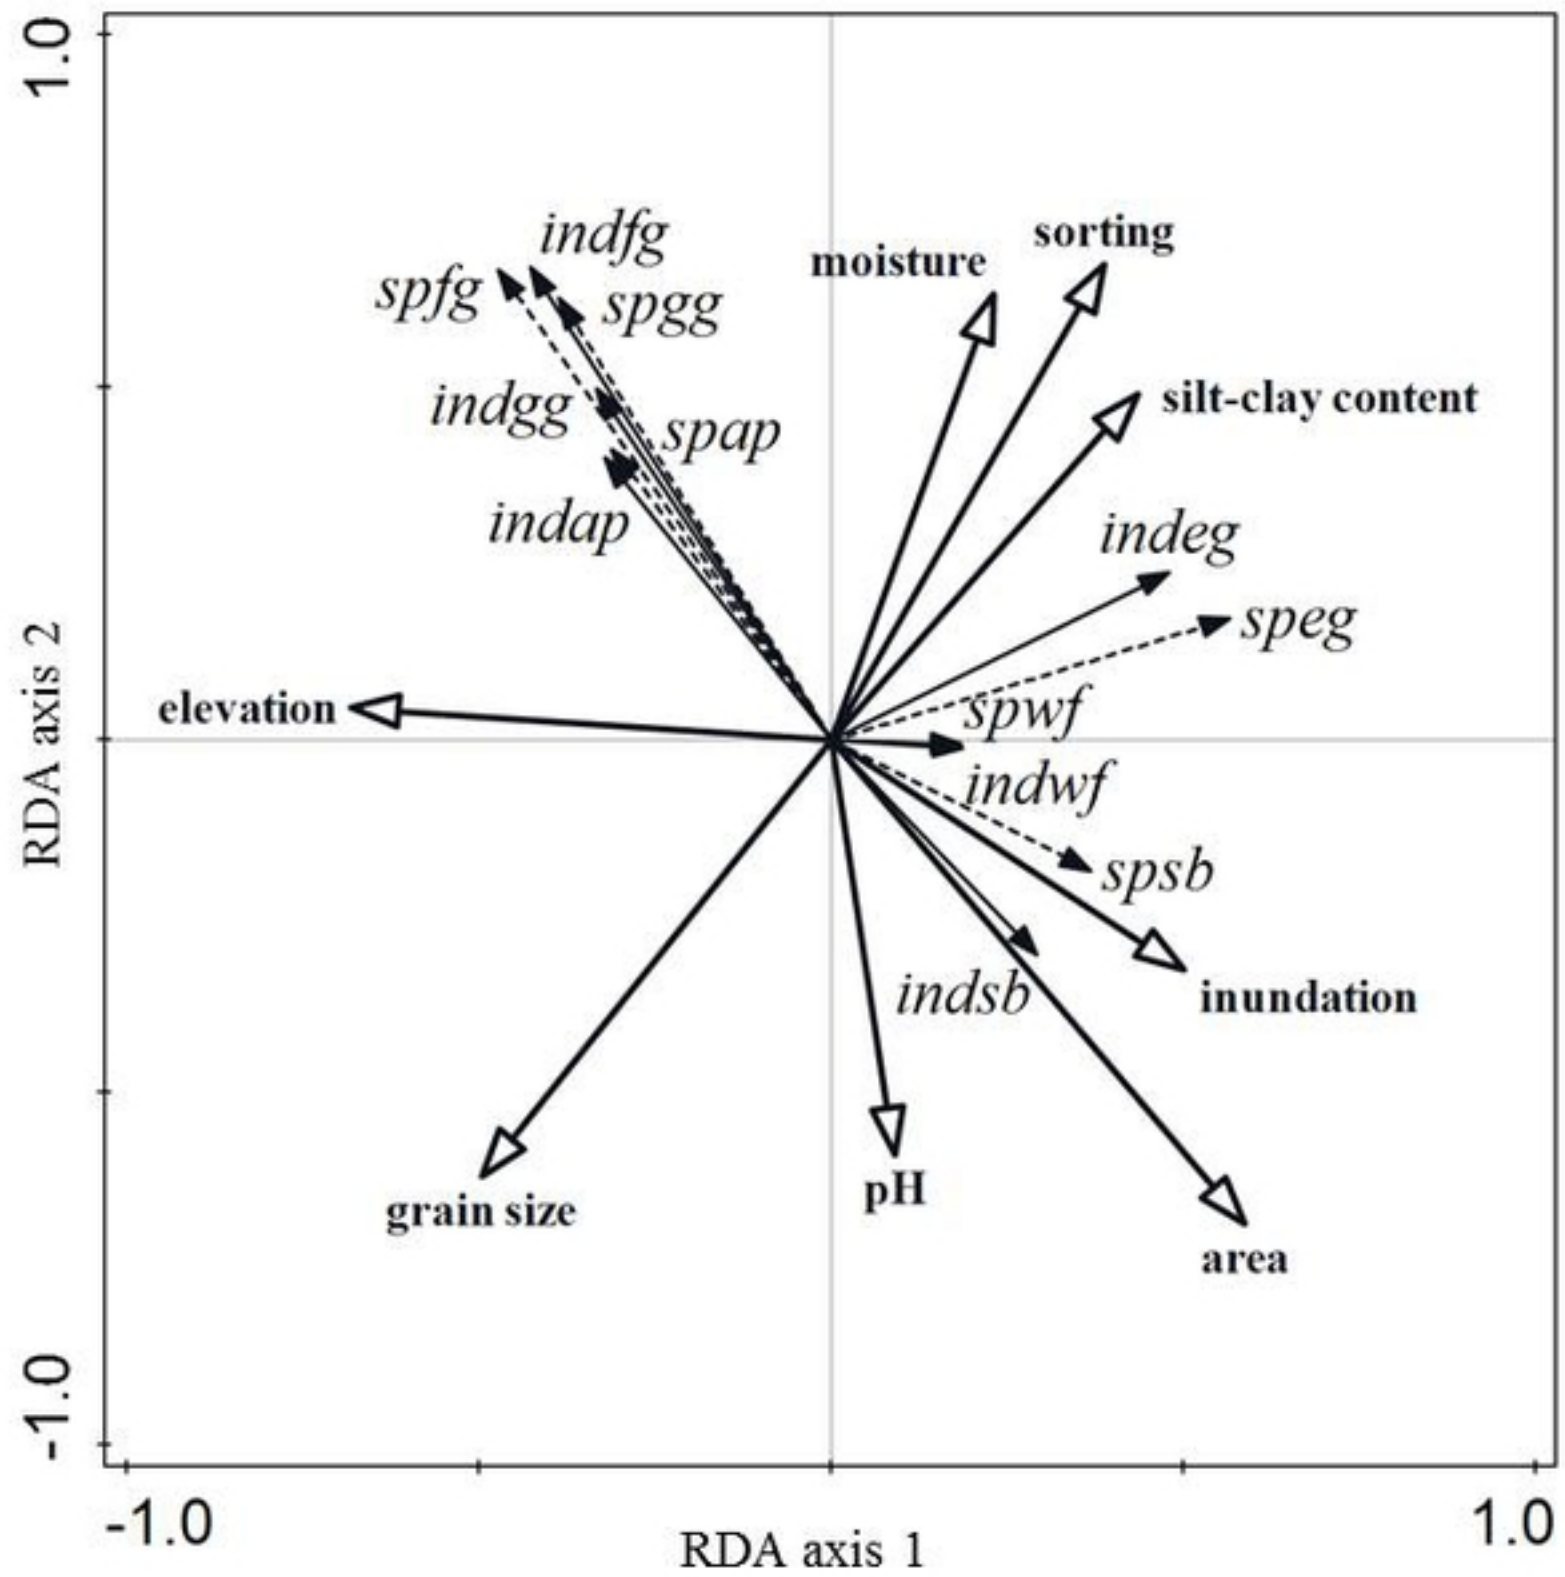

Fig 7
